# Supplementary material for: New Peptaibiotics and a Cyclodepsipeptide from Ijuhya vitellina: Isolation, Identification, Cytotoxic and Nematicidal Activities
Source: PubMed Central journal article supplement (PMC7148537; doi:10.3390/antibiotics9030132), 2020-03-22
Supplement: antibiotics-09-00132-s001.pdf [file antibiotics-09-00132-s001.pdf]

## Supporting Information

### **New peptaibiotics and a cyclodepsipeptide from *Ijuhya vitellina*: Isolation, identification, cytotoxic and nematicidal activities.**

**Ashaimaa Y. Moussa<sup>1,2</sup>, Christopher Lambert<sup>3</sup>, Theresia E.B. Stradal<sup>3</sup>, Samad Ashrafi<sup>4</sup>, Wolfgang Maier<sup>4</sup>, Marc Stadler<sup>1</sup>, Soleiman Helaly<sup>1,5\*</sup>**

<sup>1</sup> Department of Microbial Drugs, Helmholtz Centre for Infection Research, Inhoffenstraße 7, 38124 Braunschweig, Germany.

<sup>2</sup> Department of Pharmacognosy, Faculty of Pharmacy, Ain shams University, Abbassia, 11566, Cairo, Egypt.

<sup>3</sup> Department of Cell Biology, Helmholtz Centre for Infection Research (HZI), Inhoffenstraße 7, 38124, Braunschweig, Germany.

<sup>4</sup> Institute for Epidemiology and Pathogen Diagnostics, Julius Kühn-Institut (JKI)– Federal Research Centre for Cultivated Plants, Braunschweig, Germany.

<sup>5</sup> Department of Chemistry, Faculty of Science, Aswan University, Aswan, Egypt.

\*Correspondence: soleiman.helaly@helmholtz-hzi.de.

## Contents

|                                                        |    |
|--------------------------------------------------------|----|
| LIST OF TABLES .....                                   | iv |
| LIST OF FIGURES .....                                  | v  |
| LIST OF TEXTS.....                                     | vi |
| 1 and 2D NMR spectral data for Leucinostatin U 1 ..... | 3  |
| 1 and 2D NMR spectral data for leucinostatin Q 2.....  | 14 |
| 1 and 2D NMR spectral data for leucinostatin P 3.....  | 24 |
| 1 and 2D NMR spectral data for arthrichitin D 4 .....  | 34 |
| 1D NMR data for chaetoglobosin B 5 .....               | 41 |
| 1D NMR data for 19-O-acetyl.chaetoglobosin B 6.....    | 41 |

## LIST OF TABLES

|                                                                                                                                                                                                                                                       |    |
|-------------------------------------------------------------------------------------------------------------------------------------------------------------------------------------------------------------------------------------------------------|----|
| S1 Table: $^1\text{H}$ NMR and $^{13}\text{C}$ NMR data of leucinostatins 1 & 2 and the characteristic chemical shift values.....                                                                                                                     | 1  |
| S2 Table: $^1\text{H}$ NMR data of leucinostatin U 1 and the characteristic chemical shift value differences $\Delta\delta_{\text{SR}}$ of the corresponding Mosher esters, recorded at 700 MHz (75% $\text{CH}_3\text{CN}/\text{D}_2\text{O}$ )..... | 13 |
| S3 Table: $^1\text{H}$ NMR and $^{13}\text{C}$ NMR data of leucinostatin P 3 and its characteristic chemical shift values.....                                                                                                                        | 22 |
| S4 Table: $^1\text{H}$ NMR and $^{13}\text{C}$ NMR data of arthrichitin D 4 and its characteristic chemical shift values.....                                                                                                                         | 32 |

## LIST OF FIGURES

|                                                                                                                                                                                                       |    |
|-------------------------------------------------------------------------------------------------------------------------------------------------------------------------------------------------------|----|
| S1 figure: <sup>1</sup> HNMR spectra of leucinostatin U 1.....                                                                                                                                        | 3  |
| S2. Figure: <sup>13</sup> CNMR spectra of leucinostatin U 1.....                                                                                                                                      | 4  |
| S3 Figure: HSQC spectra of leucinostatin U 1.....                                                                                                                                                     | 5  |
| S4 Figure: HMBC spectra of leucinostatin U 1.....                                                                                                                                                     | 6  |
| S5 Figure: COSY spectra of leucinostatin U 1.....                                                                                                                                                     | 7  |
| S6 Figure: NOESY spectra of leucinostatin U 1.....                                                                                                                                                    | 8  |
| S7 Figure: TOCSY spectra of leucinostatin U 1.....                                                                                                                                                    | 9  |
| S8 Figure: HR-ESI-MS spectra of Marfay's reaction products of leucinostatin U 1.....                                                                                                                  | 10 |
| S9 Figure: $\Delta\delta$ SR chemical shifts of MTPA ( $\alpha$ -methoxy- $\alpha$ -trifluoromethylphenylacetic acid) (Mosher) derivatives of the proline, AHMOD and Hy-Leu of leucinostatin U 1..... | 11 |
| S10 Figure: HR-ESI-MS-MS fragmentation pattern of leucinostatin U 1.....                                                                                                                              | 12 |
| S11 figure: <sup>1</sup> HNMR spectra of leucinostatin Q 2.....                                                                                                                                       | 14 |
| S12. Figure: <sup>13</sup> CNMR spectra of leucinostatin Q 2.....                                                                                                                                     | 15 |
| S13 Figure: HSQC spectra of leucinostatin Q 2.....                                                                                                                                                    | 16 |
| S14Figure: HMBC spectra of leucinostatin Q 2.....                                                                                                                                                     | 17 |
| S15 Figure: COSY spectra of leucinostatin Q 2.....                                                                                                                                                    | 18 |
| S16 Figure: NOESY spectra of leucinostatin Q 2.....                                                                                                                                                   | 19 |
| S17 Figure: TOCSY spectra of leucinostatin Q 2.....                                                                                                                                                   | 20 |
| S18 Figure: HR-ESI-MS-MS fragmentation pattern of leucinostatin Q 2.....                                                                                                                              | 21 |
| S19 figure: <sup>1</sup> HNMR spectra of leucinostatin P 3.....                                                                                                                                       | 24 |
| S20 Figure: HSQC spectra of leucinostatin P 3.....                                                                                                                                                    | 25 |
| S21 Figure: HMBC spectra of leucinostatin P 3.....                                                                                                                                                    | 26 |
| S22 Figure: COSY spectra of leucinostatin P 3.....                                                                                                                                                    | 27 |
| S23 Figure: NOESY spectra of leucinostatin P 3.....                                                                                                                                                   | 28 |
| S24 Figure: TOCSY spectra of leucinostatin P 3.....                                                                                                                                                   | 29 |
| S25 Figure: HR-ESI-MSMS fragmentation pattern of leucinostatin P 3.....                                                                                                                               | 30 |
| S26 Figure: HR-ESI-MS-MS fragments of leucinostatin P 3.....                                                                                                                                          | 31 |
| S27.Figure: <sup>1</sup> HNMR spectra of arthrichitin D 4.....                                                                                                                                        | 34 |
| S28 Figure: <sup>13</sup> CNMR spectra of arthrichitin D 4.....                                                                                                                                       | 35 |
| S29 Figure: HSQC spectra of arthrichitin D 4.....                                                                                                                                                     | 36 |
| S30 Figure: HMBC spectra of arthrichitin D 4.....                                                                                                                                                     | 37 |
| S31 Figure: COSY spectra of arthrichitin D 4.....                                                                                                                                                     | 38 |
| S32 Figure: NOESY spectra of arthrichitin D 4.....                                                                                                                                                    | 39 |
| S33 Figure: ROESY spectra of arthrichitin D 4.....                                                                                                                                                    | 40 |
| S34 Figure: HR-ESI-MS of arthrichitin D 4. ....                                                                                                                                                       | 41 |

**LIST OF TEXT:**

**S1 Text:  $^1\text{H}$  NMR spectral data of chaetoglobosin B (5) and its characteristic chemical shift values....42**  
**S2 Text:  $^1\text{H}$  NMR and  $^{13}\text{C}$  NMR data of 19-O-acetyl chaetoglobosin B (6) and its characteristic chemical shift values.....42**

**S1 Table.** <sup>1</sup>H NMR and <sup>13</sup>C NMR data of **1** & **2** and the characteristic chemical shift values.

| residue      | leucinostatin U (1) |                      |                                  | leucinostatin Q (2) |              |
|--------------|---------------------|----------------------|----------------------------------|---------------------|--------------|
|              | position            | δC, type             | δH( J in Hz)                     | δC, type            | δH( J in Hz) |
| <b>ΔMHA</b>  | 1                   | 165.15, C<br>120.27, |                                  | 165.45,C            |              |
|              | 2                   | CH                   | 6.14, (15.04)<br>6.58 (7.7,      | 120.65,CH           | 6.25         |
|              | 3                   | 150.02,CH            | 15.0)                            | 151.24,CH           | 6.66         |
|              | 4                   | 38.10,CH             | 2.22                             | 37.82,CH            | 2.26         |
|              | 5                   | 29.23,CH2            | 1.36                             | 28.86,CH2           | 1.38         |
|              | 6                   | 12.10,CH3            | 0.88                             | 11.88,CH3           | 0.87         |
|              | 7                   | 19.86,CH3            | 0.99(6.3)                        | 18.85,CH3           | 1.04         |
| <b>Pro</b>   | 1                   | 174.76,C             |                                  | 173.6,C             |              |
|              | 2                   | 62.28,CH             | 4.2(4.12, 8.9)                   | 61.61,CH            | 4.26         |
|              | 3                   | 30.22,CH2            | 2.22                             | 29.84,CH2           | 2.19         |
|              |                     |                      | 1.8                              |                     | 1.82         |
|              | 4                   | 24.80,CH2            | 1.94                             | 24.80,CH2           | 1.94         |
|              | 5                   | 47.75,CH2            | 3.91                             | 47.53,CH2           | 3.81         |
|              |                     |                      | 3.52                             |                     | 3.6          |
| <b>AHMOD</b> | 1                   | 175.05, C            |                                  | 173.5,C             |              |
|              | 2                   | 54.38,CH<br>34.82,   | 4.09                             | 52.84,CH            | 4.17         |
|              | 3                   | CH2                  | 2.07                             | 36.01,CH2           | 1.88         |
|              |                     |                      | 1.16                             |                     | 1.36         |
|              | 4                   | 25.47,CH             | 1.76                             | 26.18,CH            | 1.68         |
|              | 5                   | 46.19,CH2            | 1.25                             | 45.58,CH2           | 1.29         |
|              |                     |                      | 1.17                             |                     | 1.24         |
|              | 6                   | 64.23,CH             | 3.94                             | 64.86,CH            | 3.97         |
|              | 7                   | 50.98,CH2            | 2.39(3.4,14.3)<br>2.33(8.7,14.3) | 50.57,CH2           | 2.42         |
|              | 8                   | 210.41,C             |                                  | 210.12,C            |              |
|              | 9                   | 36.14,CH2            | 2.42                             | 36.26,CH2           | 2.44         |
| 10           | 7.89,CH3            | 0.89(7.4)            | 7.79,CH3                         | 0.9                 |              |
| 11           | 22.91,CH3           | 0.89                 | 23.32,CH3                        | 0.9                 |              |
| NH           |                     | 9.68                 |                                  | 6.97                |              |
| <b>Hyleu</b> | 1                   | 172.10,C             |                                  | 172.16              |              |
|              | 2                   | 61.77,CH             | 3.81                             | 58.64,CH            | 4.11         |
|              | 3                   | 73.24,CH             | 3.76                             | 75.05,CH            | 3.64         |
|              | 4                   | 29.67,CH             | 1.59                             | 30.34,CH            | 1.58         |
|              | 5                   | 15.13,CH3            | 0.88                             | 17.48,CH3           | 0.91         |
|              | 6                   | 19.88,CH3            | 0.79                             | 19.70,CH3           | 0.83         |
| NH           |                     | 9.03                 |                                  | 7.74                |              |
| <b>Aib1</b>  | 1                   | 174.56,C             |                                  | 174.6               |              |

|                   |       |           |            |           |      |
|-------------------|-------|-----------|------------|-----------|------|
|                   | 2     | 55.7,C    |            | 55.80,C   |      |
|                   | 3     | 22.30,CH3 | 1.34       | 23.39,CH3 | 1.38 |
|                   | 4     | 26.10,CH3 | 1.41       | 25.14,CH3 | 1.34 |
|                   | NH    |           | 8.47       |           | 8.16 |
| <b>Aib2</b>       | 1     | 175.64,C  |            | 173.24,C  |      |
|                   | 2     | 56.0,C    |            | 55.94,C   |      |
|                   | 3     | 22.6,CH3  | 1.32       | 25.63,CH3 | 1.31 |
|                   | 4     | 25.83,CH3 | 1.46       | 23.32,CH3 | 1.38 |
|                   | NH    |           | 7.56       |           | 7.43 |
| <b>Leu</b>        | 1     | 174.43,C  |            | 173.16,C  |      |
|                   | 2     | 55.82,CH  | 3.78       | 53.76,CH  | 3.83 |
|                   | 3     | 39.80,CH2 | 1.75       | 39.41,CH2 | 1.77 |
|                   |       |           | 1.64       |           | 1.58 |
|                   | 4     | 24.54,CH  | 1.76       | 24.55,CH  | 1.76 |
|                   | 5     | 22.57,CH3 | 0.84(6.3)  | 21.75,CH3 | 0.84 |
|                   | 6     | 22.91,CH3 | 0.89       | 23.32,CH3 | 0.9  |
|                   | NH    |           | 7.75       |           | 6.92 |
| <b>Aib3</b>       | 1     | 173.97,C  |            | 175.2,C   |      |
|                   | 2     | 56.04,C   |            | 56.09,C   |      |
|                   | 3     | 22.3,CH3  | 1.36       | 22.90,CH3 | 1.38 |
|                   | 4     | 26.54,CH3 | 1.4        | 25.66,CH3 | 1.35 |
|                   | NH    |           | 8.12       |           | 7.57 |
| <b>Aib4</b>       | 1     | 173.90,C  |            | 173.31,C  |      |
|                   | 2     | 55.73,C   |            | 55.97,C   |      |
|                   | 3     | 26.79,CH3 | 1.47       | 25.76,CH3 | 1.34 |
|                   | 4     | 22.90,CH3 | 1.38       | 23.44,CH3 | 1.37 |
|                   | NH    |           | 7.16       |           | 7.57 |
| <b>C-terminal</b> | 1     | 40.64,CH  | 4.4(m)     | 43.15,CH  | 3.81 |
|                   | 2     | 68.65,CH2 | 3.61(9.8)  | 63.31,CH2 | 2.31 |
|                   |       |           | 3.5(7.6)   |           |      |
|                   | 3     | 66.59,CH2 | 3.46 (5.3) | 60.21,CH2 | 2.45 |
|                   | 4     | 55.48,CH2 | 3.86 (5.3) | 59.22,CH2 | 3.44 |
|                   | 5     | 51.91,CH3 | 3.11(5.9)  | 19.27,CH3 | 1.02 |
|                   | 6     | 51.91,CH3 | 3.11(5.9)  |           |      |
|                   | 7     | 20.86,CH3 | 1.15(6.4)  |           |      |
|                   | NH    |           | 7.36       |           | 7.75 |
|                   | N-CH3 |           |            | 43.41,CH3 | 2.2  |

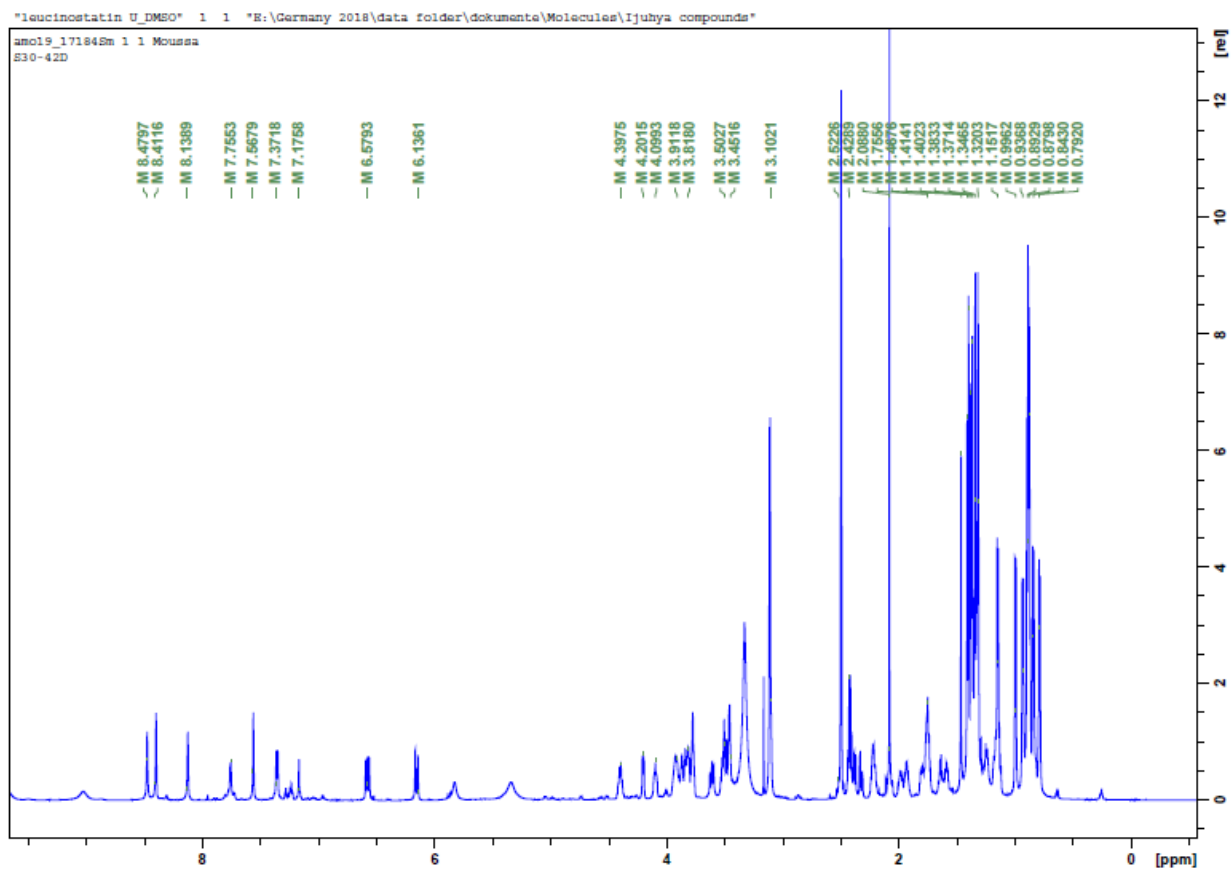

S1 figure: <sup>1</sup>HNMR spectra of leucinostatin U 1.



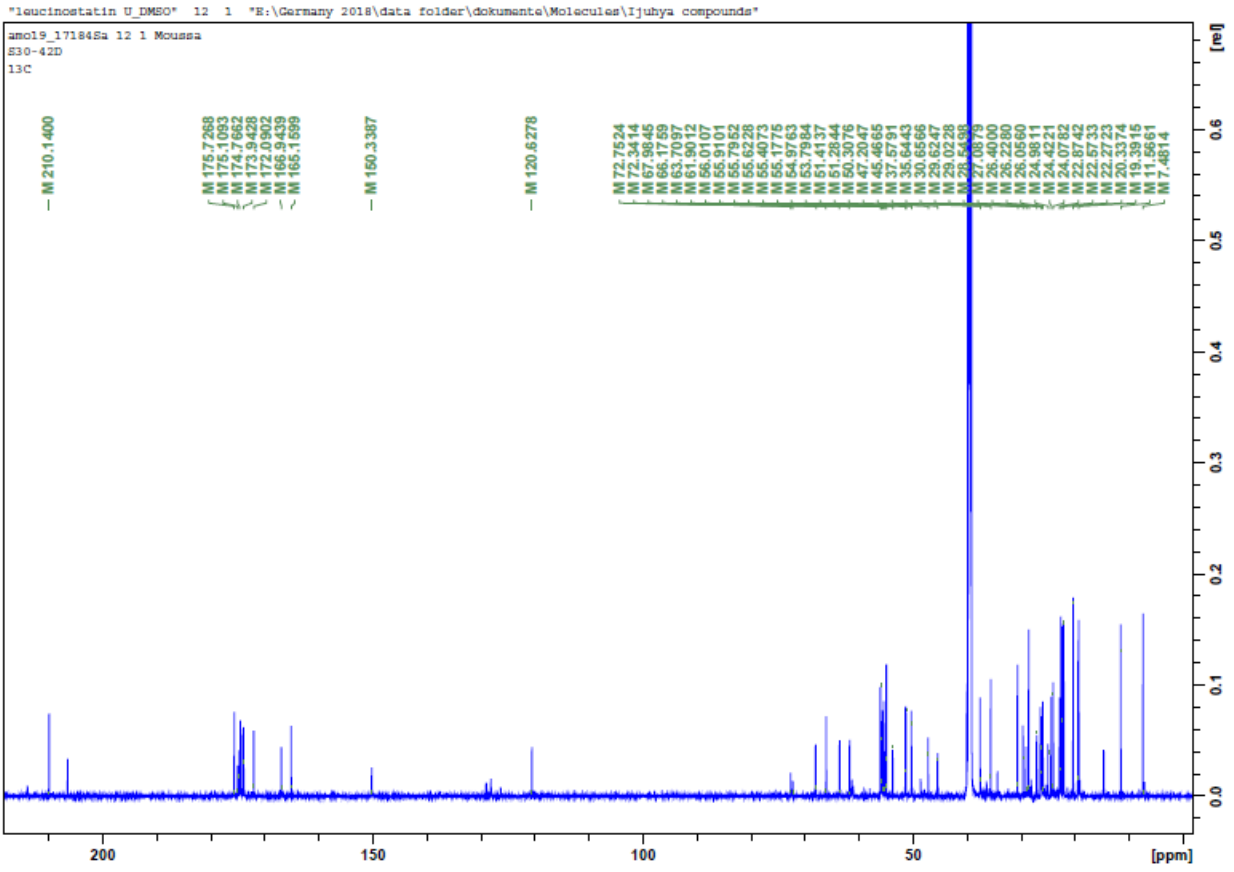

S2. Figure:  $^{13}\text{C}$ NMR spectra of leucinoestatin U.1.

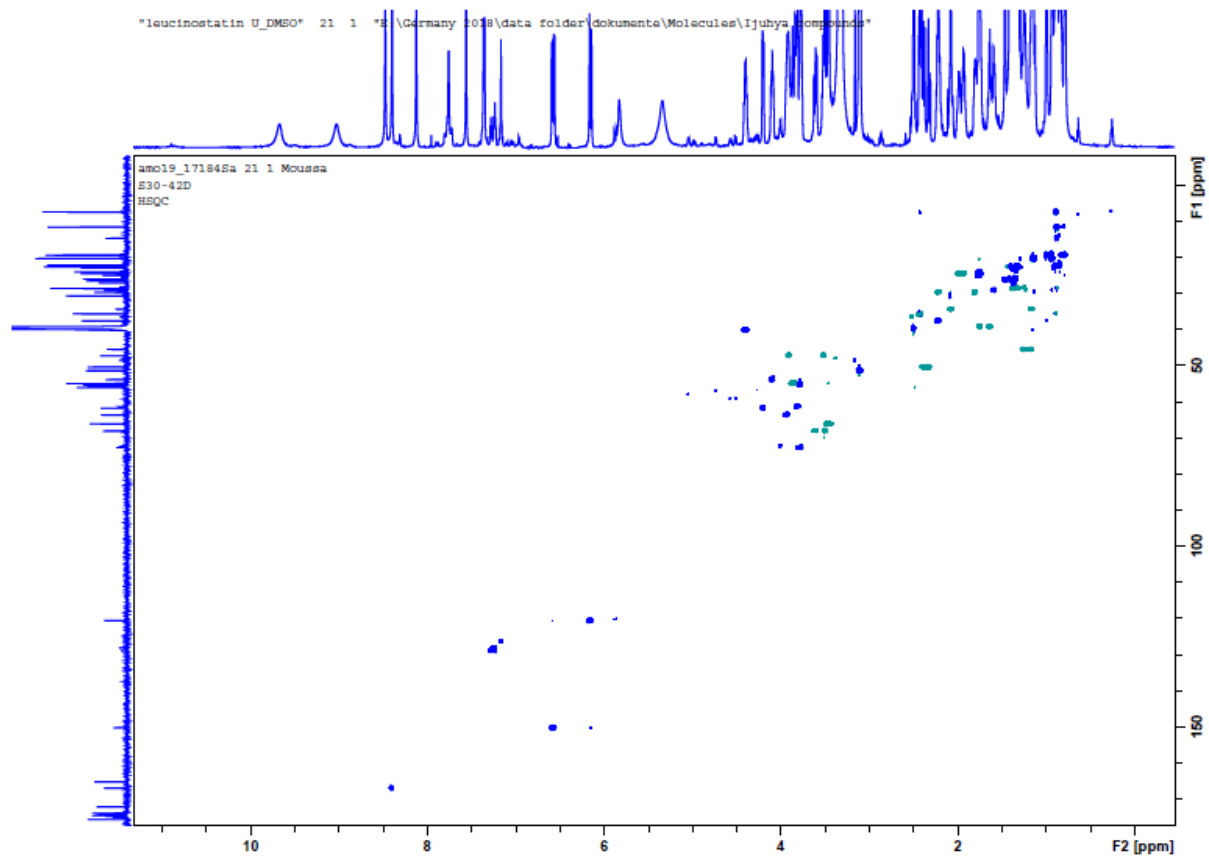

S3 Figure: HSQC spectra of leucinostatin U 1.

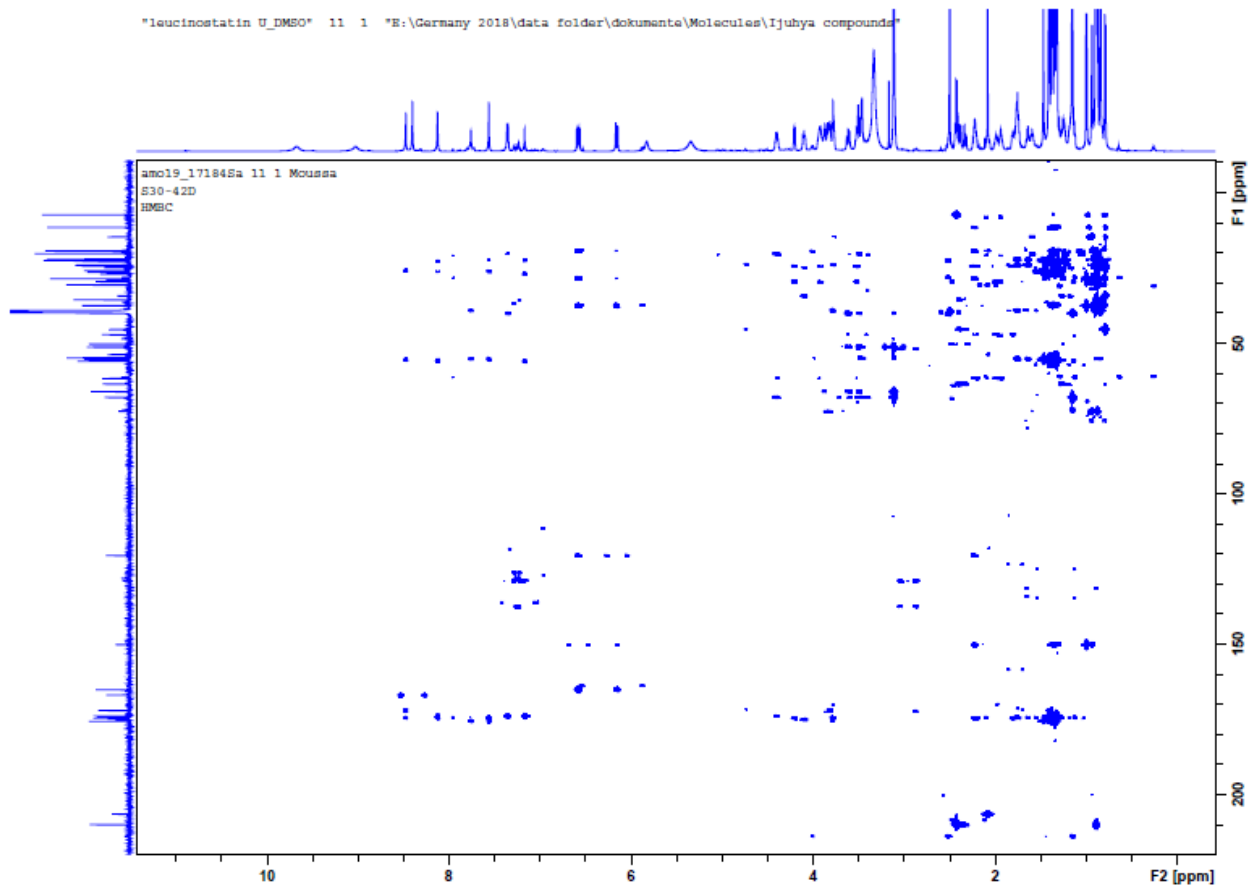

S4 Figure: HMBC spectra of leucinostatin U 1

amo19\_17184Sa 13 1 Moussa  
S30-42D  
Cosy

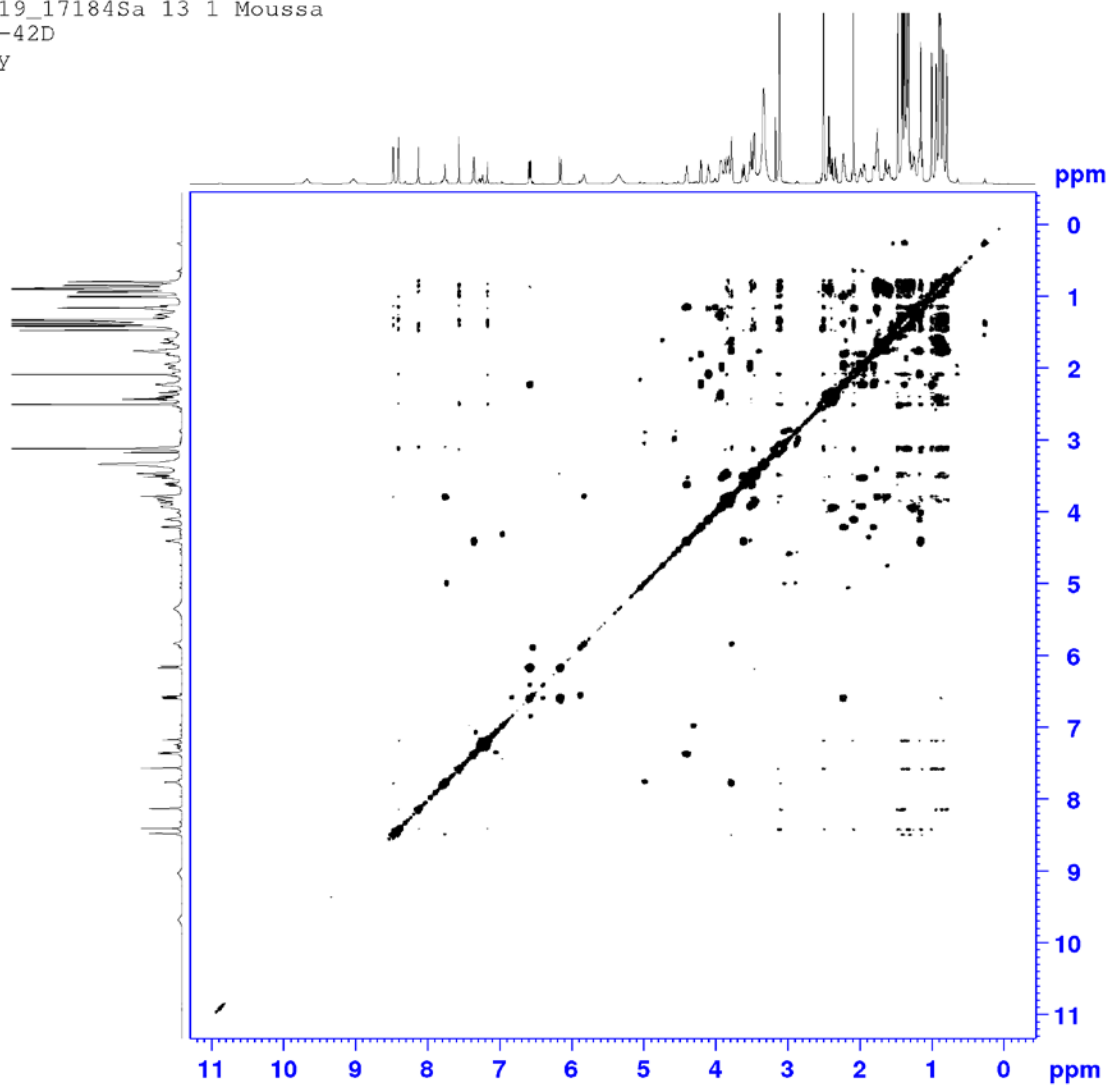

**S5 Figure: COSY spectra of leucinostatin U 1.**

>19\_17184Sm 3 1 Moussa  
)-42D  
esy

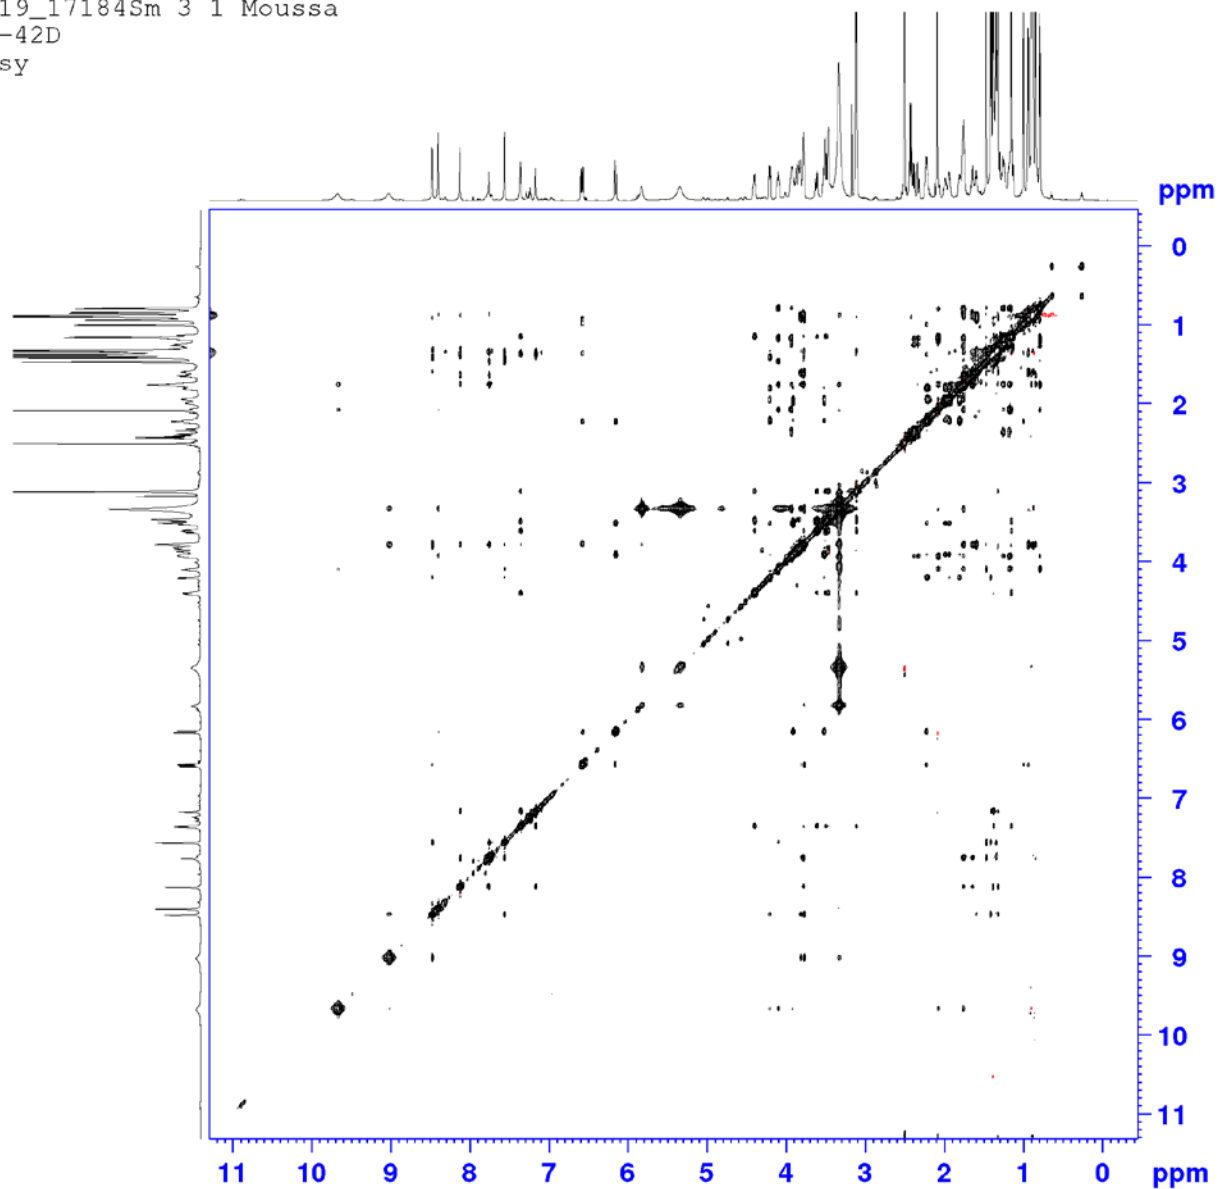

S6 Figure: NOESY spectra of leucinostatin U 1

amo19\_17184Sm 2 1 Moussa  
S30-42D  
Tocsy

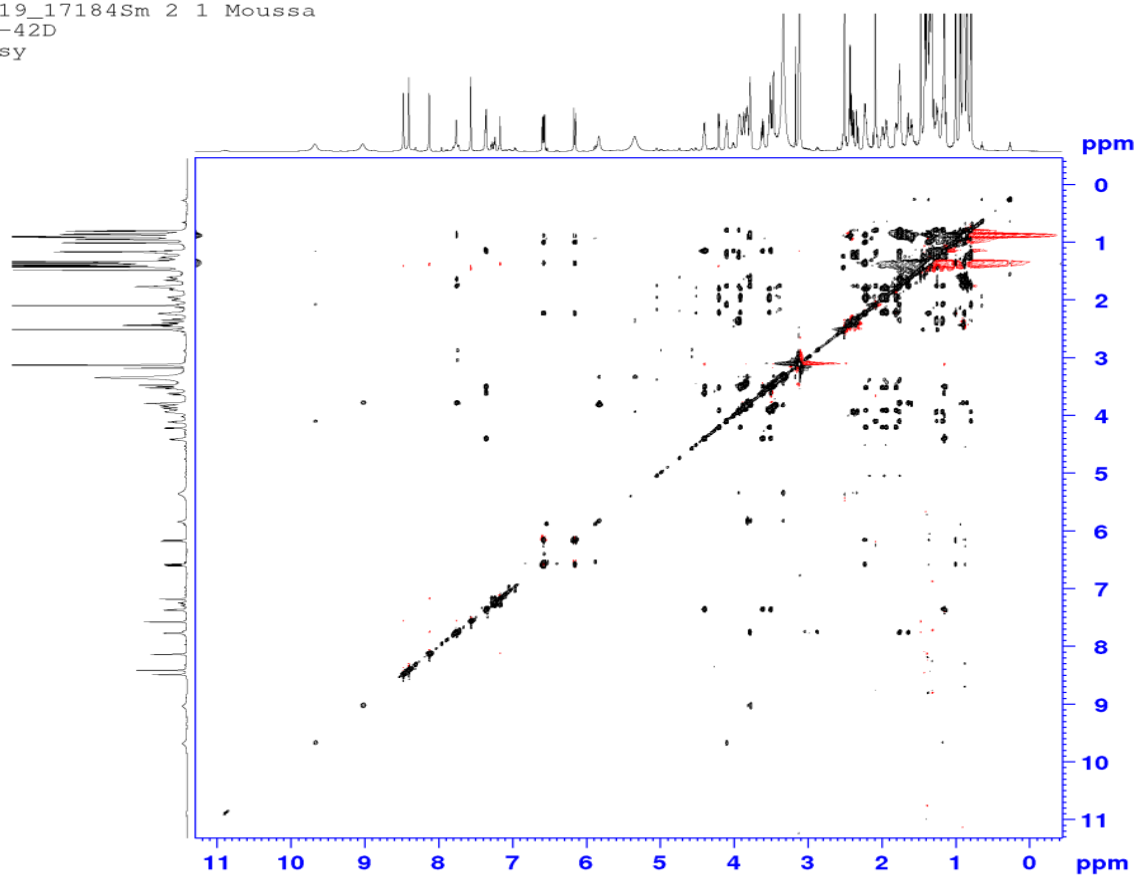

**S7 Figure:** TOCSY spectra of leucinostatin U 1.

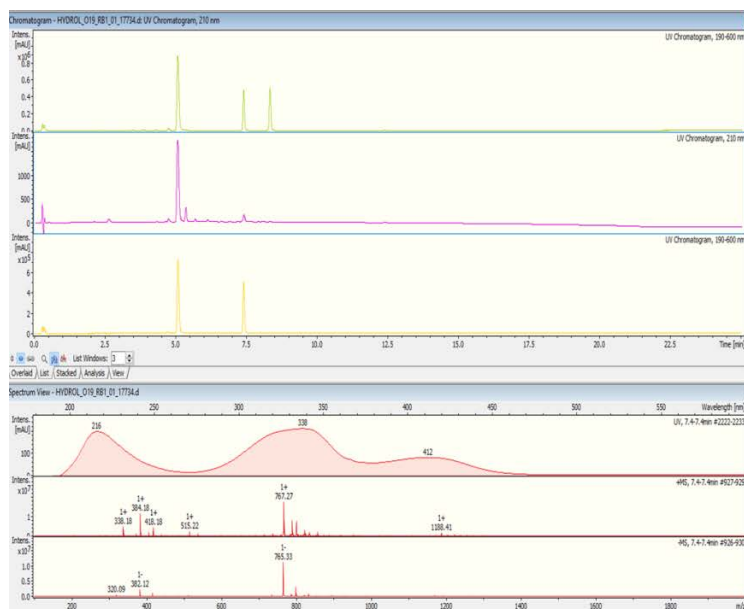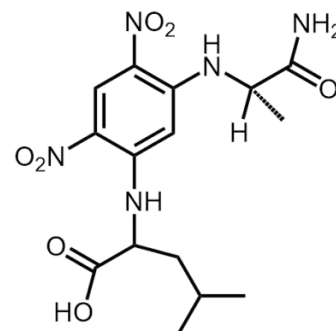

Chemical Formula: C<sub>15</sub>H<sub>21</sub>N<sub>5</sub>O<sub>7</sub>  
 Exact Mass: 383,14  
 Molecular Weight: 383,36

**FDLA- D-leucine and DL-leucine**

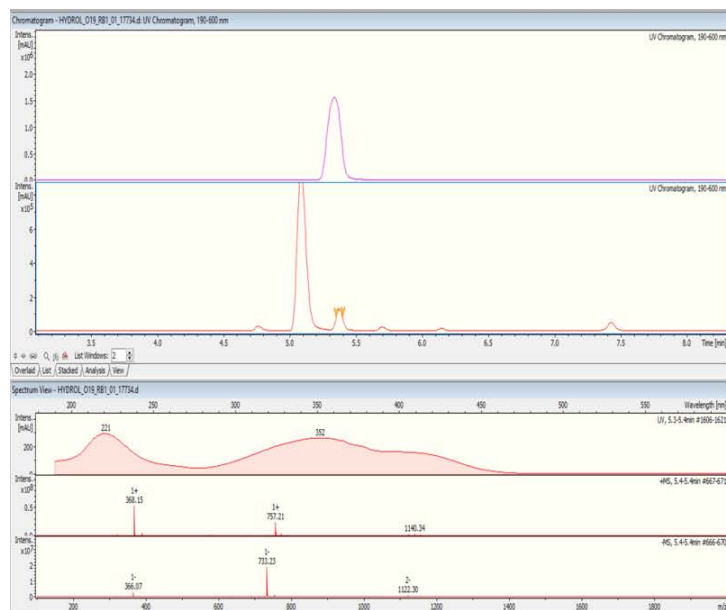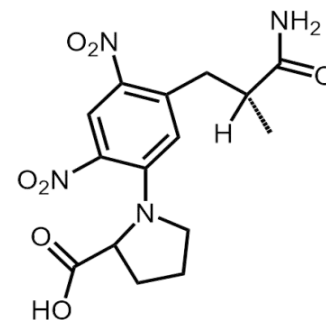

Chemical Formula: C<sub>15</sub>H<sub>18</sub>N<sub>4</sub>O<sub>7</sub>  
 Exact Mass: 366,12  
 Molecular Weight: 366,33

**FDLA-L- Proline and D-proline**

**S8 Figure.** HR-ESI-MS of Marfay's reaction products of leucinostatin U 1.

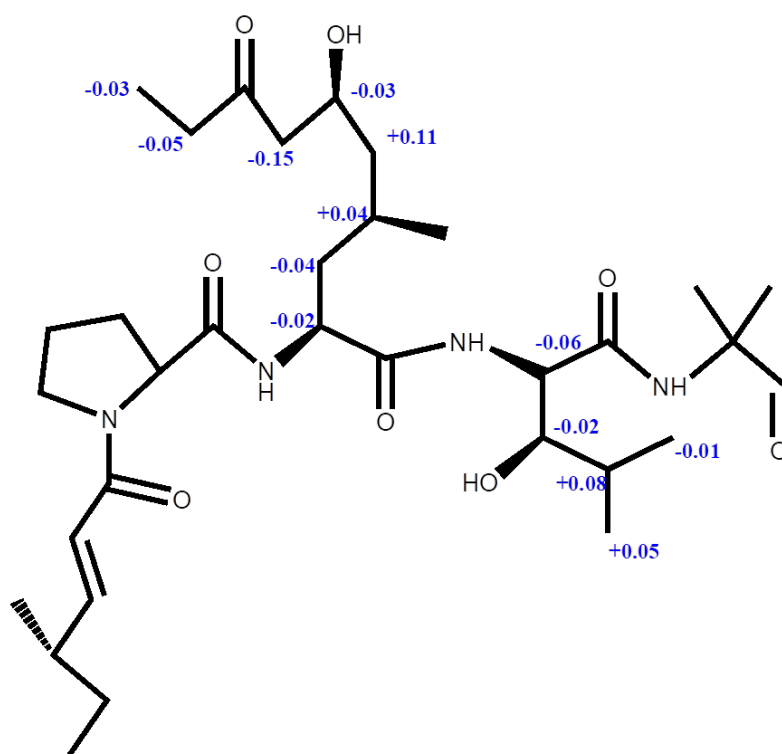

**S9 Figure.**  $\Delta\delta_{SR}$  chemical shifts of MTPA ( $\alpha$ -methoxy- $\alpha$ -trifluoromethylphenylacetic acid) (Mosher) derivatives of the proline, AHMOD and Hy-Leu of **1**.



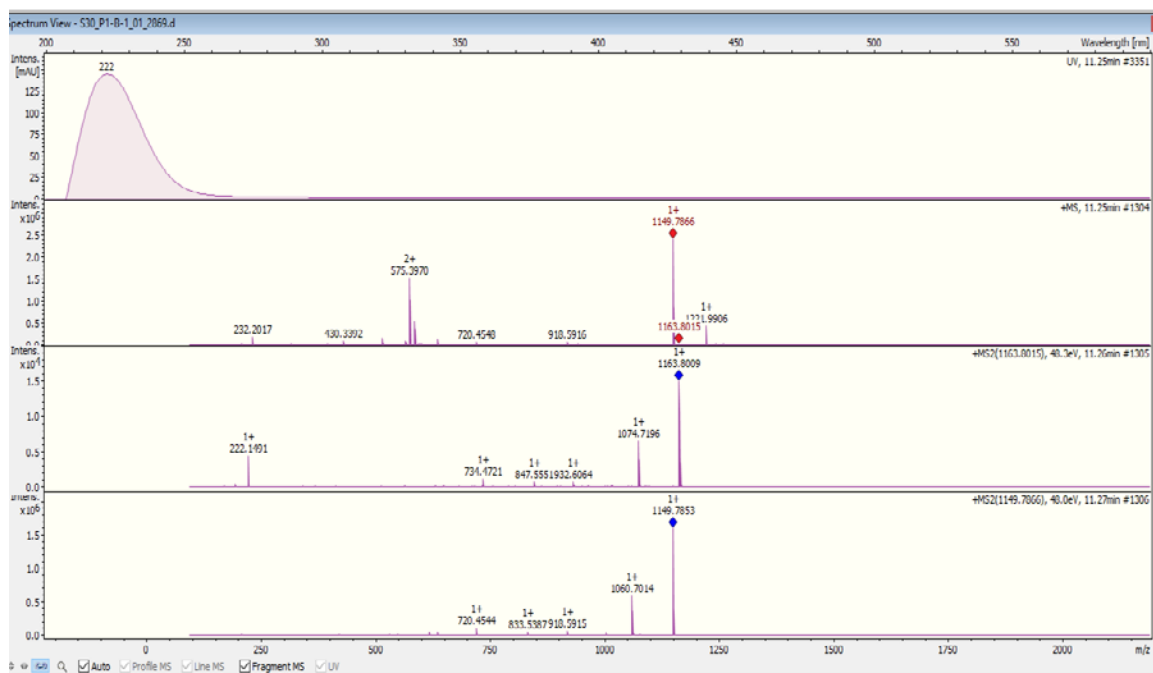

**S10 Figure.** HR-ESI-MS-MS fragmentation pattern of leucinostatin U 1.

**S2.Table.** <sup>1</sup>H NMR data of **leucinostatin U 1** and the characteristic chemical shift value differences  $\Delta\delta_{SR}$  of the corresponding Mosher esters, recorded at 700 MHz (75% CH<sub>3</sub>CN/D<sub>2</sub>O).

| position     | $\delta H$ leucinostatin U (1) | $\delta H$ of leucinostatin U (1) reacted with R-MTPA-Cl | $\delta H$ of leucinostatin U (1) reacted with S-MTPA-Cl | $\Delta S-\Delta R$ (ppm) | $\Delta S-\Delta R$ (Hz) |
|--------------|--------------------------------|----------------------------------------------------------|----------------------------------------------------------|---------------------------|--------------------------|
| <b>AHMOD</b> |                                |                                                          |                                                          |                           |                          |
| 2            | 4.67                           | 4.73,CH                                                  | 4.71,CH                                                  | -0.02                     | -14                      |
| 3            | 2.57, 1.29                     | 1.52, 2.51CH <sub>2</sub>                                | 1.92, 2.76,CH <sub>2</sub>                               | -0.04                     | -28                      |
| 4            | 1.74                           | 1.72                                                     | 1.68, CH <sub>2</sub>                                    | 0.04                      | 28                       |
| 10           | 1                              | 0.98                                                     | 0.97                                                     | 0.01                      | 7                        |
| 5            | 1.55, 1.19                     | 1.62, 1.30                                               | 1.73                                                     | 0.11                      | 77                       |
| 6            | 4.58                           | 4.68                                                     | 4.51,CH <sub>2</sub>                                     | -0.03                     | -21                      |
| 7            | 2.98                           | 2.56, 2.72                                               | 3.22, 2.99, CH <sub>2</sub>                              | -0.15                     | -105                     |
| 8            | 2.57, 1.29                     | 2.64, 2.53                                               | 2.59,2.45,CH <sub>2</sub>                                | -0.05                     | -35                      |
| 9            | 1.06                           | 0.99                                                     | 1.02                                                     | -0.03                     | -21                      |
| <b>Hyleu</b> |                                |                                                          |                                                          |                           |                          |
| 2            | 4.39                           | 4.60,CH                                                  | 4.55,CH                                                  | -0.06                     | -42                      |
| 3            | 4.52                           | 4.45,CH                                                  | 4.47,CH                                                  | -0.02                     | -14                      |
| 4            | 1.88                           | 1.86,CH                                                  | 1.94,CH                                                  | 0.08                      | 56                       |
| 5            | 0.85                           | 0.88,CH <sub>3</sub>                                     | 0.93,CH <sub>3</sub>                                     | 0.05                      | 35                       |
| 6            | 1.42                           | 1.34,CH <sub>3</sub>                                     | 1.35,CH <sub>3</sub>                                     | -0.01                     | -1                       |

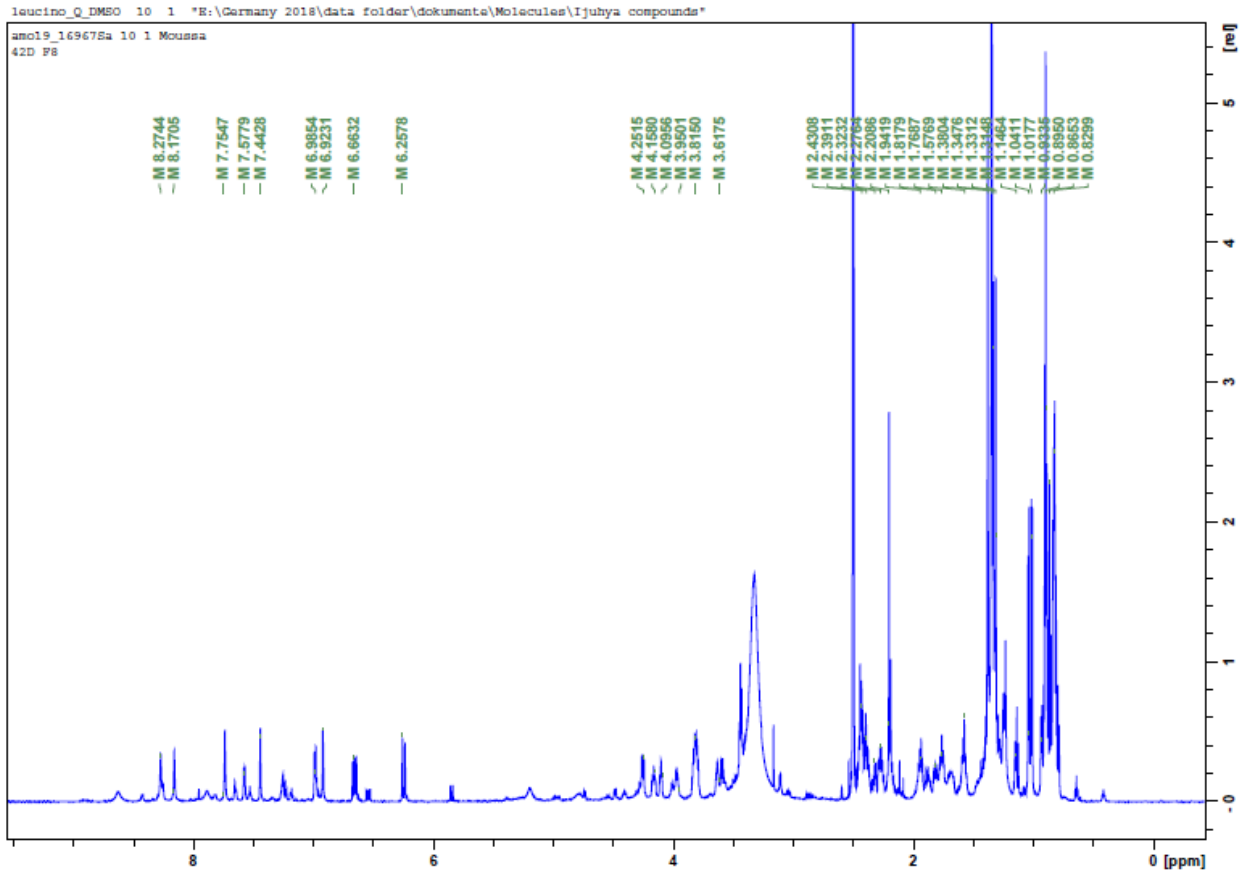

S11 figure: <sup>1</sup>H NMR spectra of leucinostatin Q 2

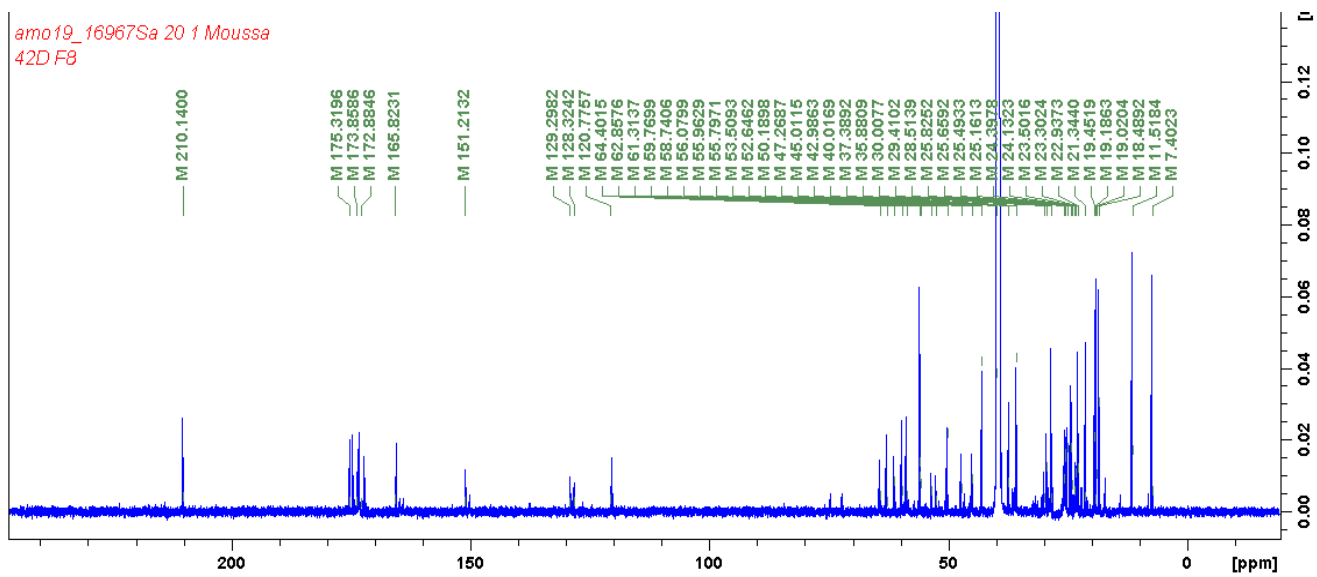

S12. Figure:  $^{13}\text{C}$ NMR spectra of leucinostatin Q2..



42D F8  
HSQC

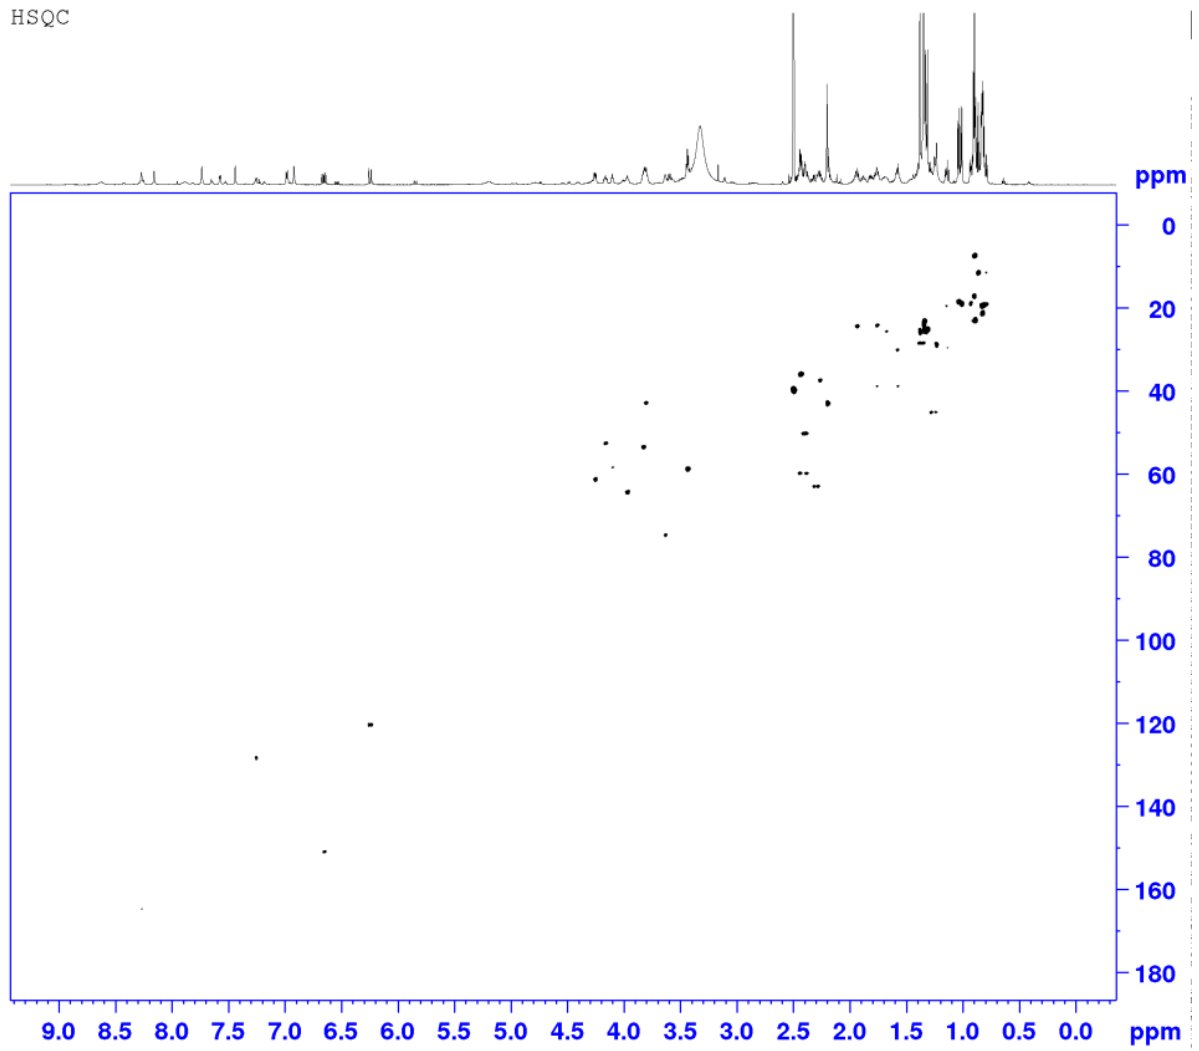

**S13 Figure:** HSQC spectra of **leucinoctatin Q 2**

42D F8  
HMBC

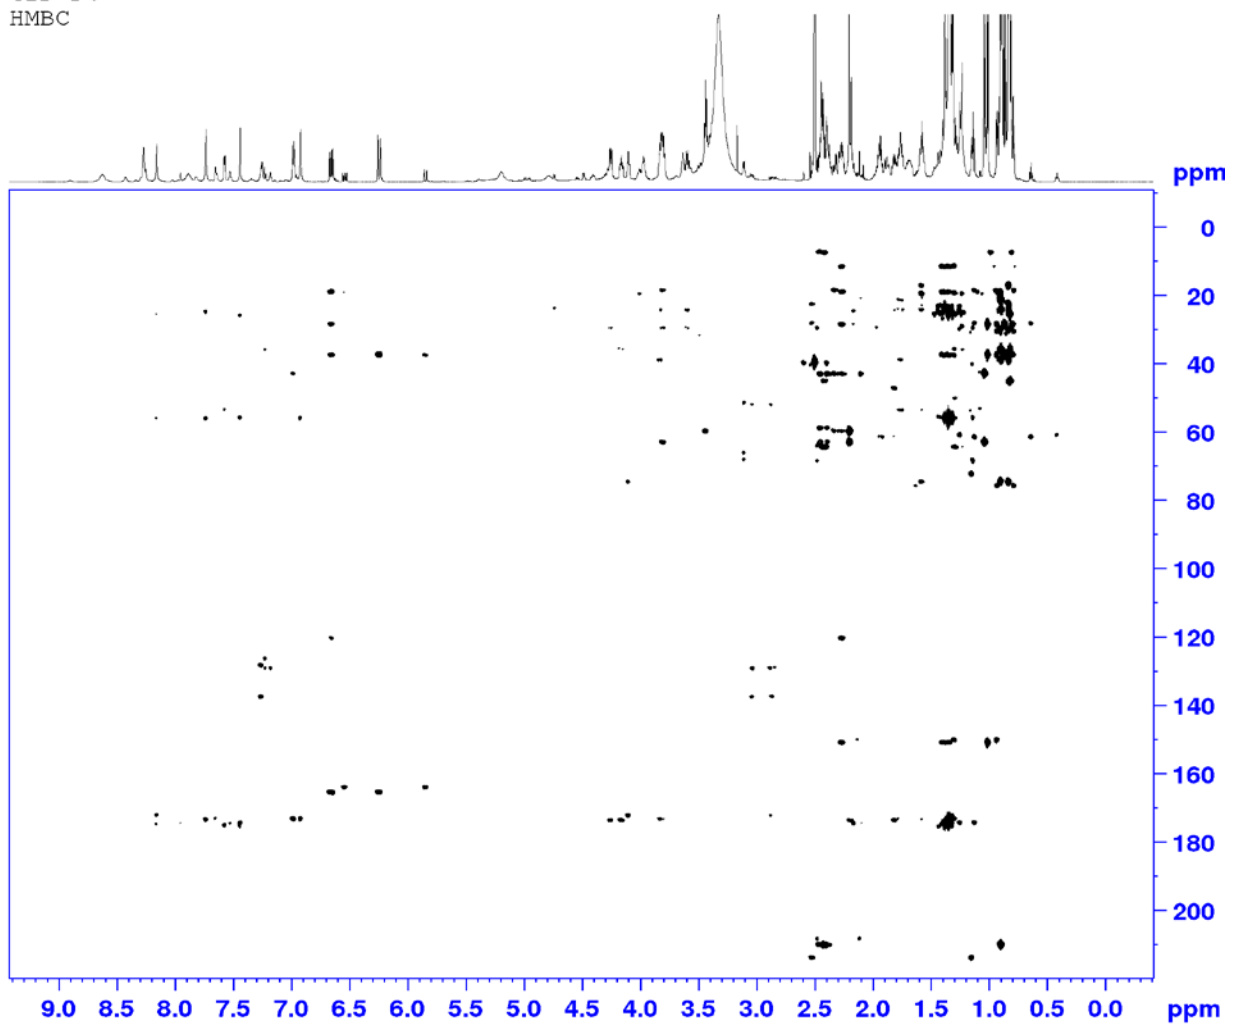

S14 Figure: HMBC spectra of leucinostatin Q 2



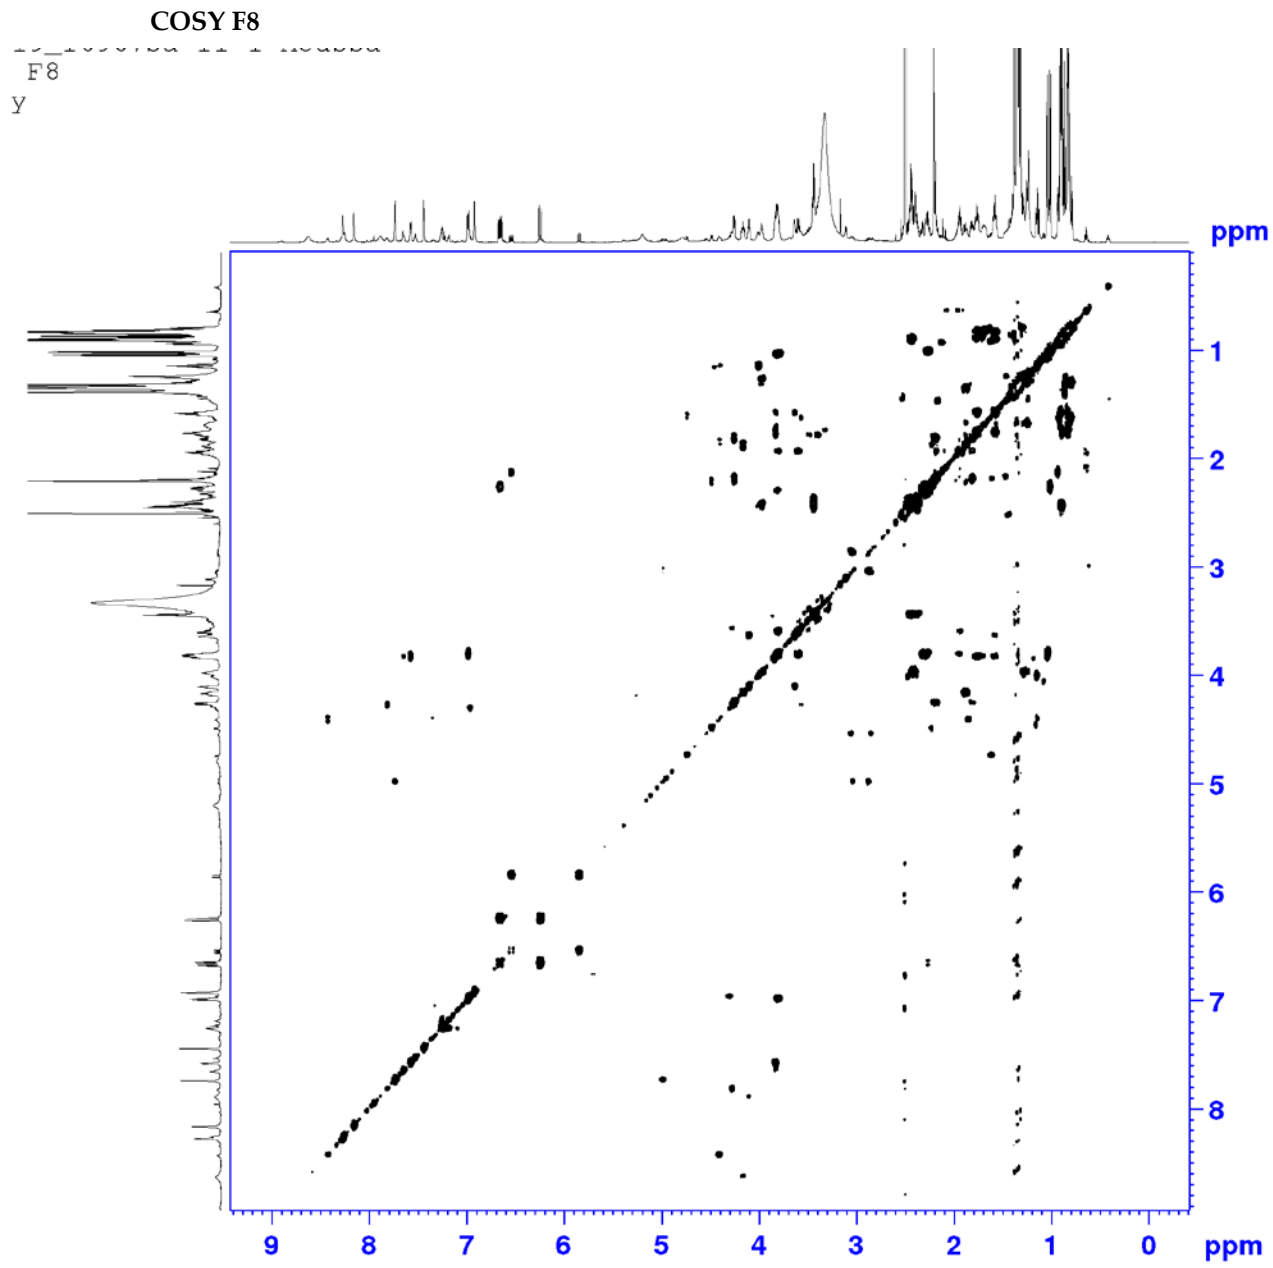

S15 Figure: COSY spectra of leucinostatin Q 2

) F8  
:sy

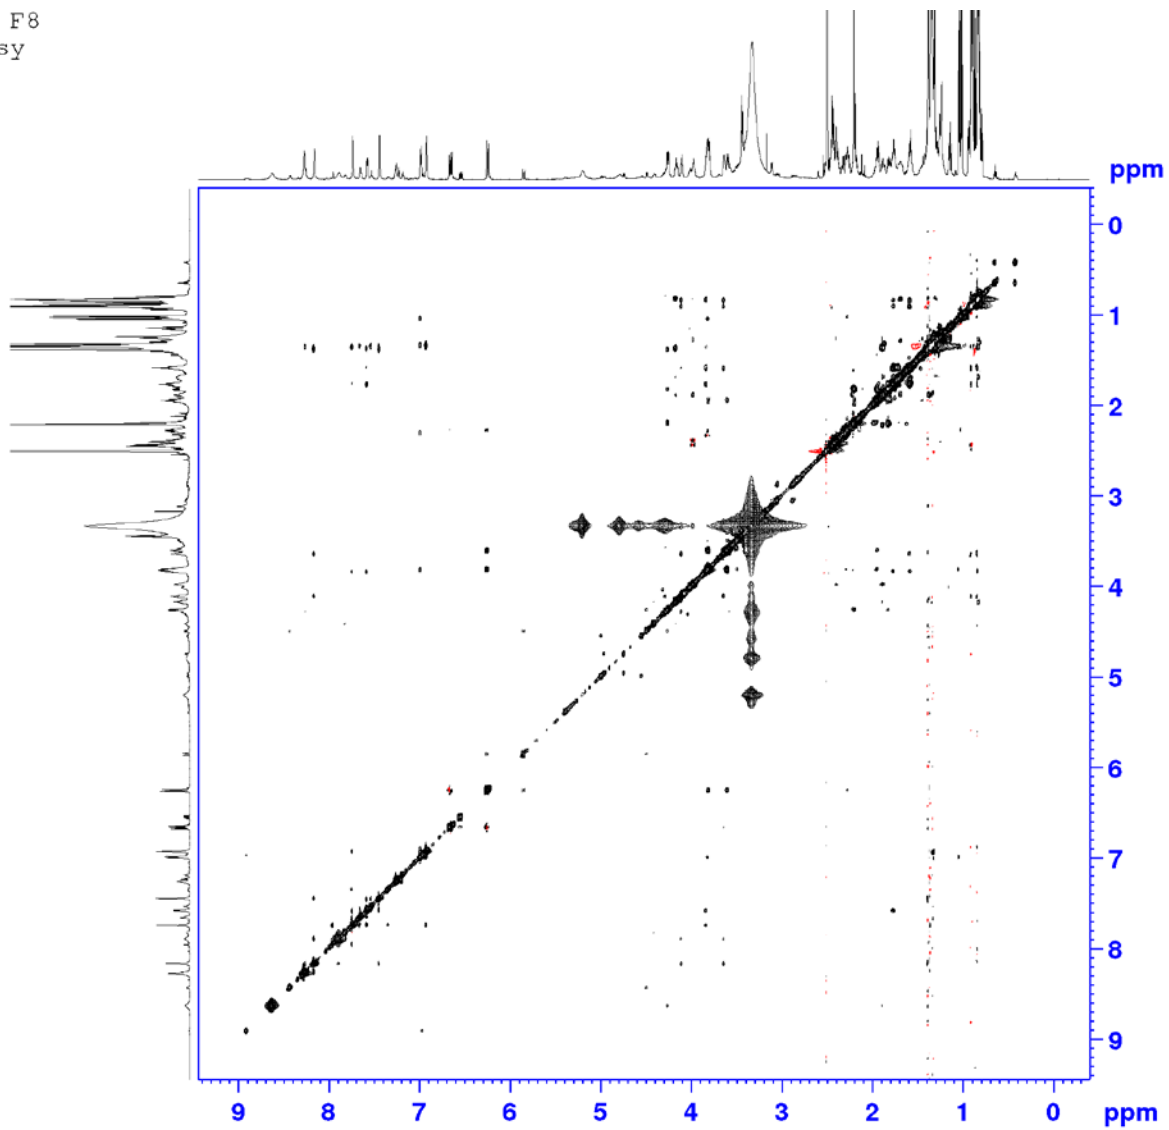

S16 Figure: NOESY spectra of leucinostatin Q 2

42D F8  
TOCSY

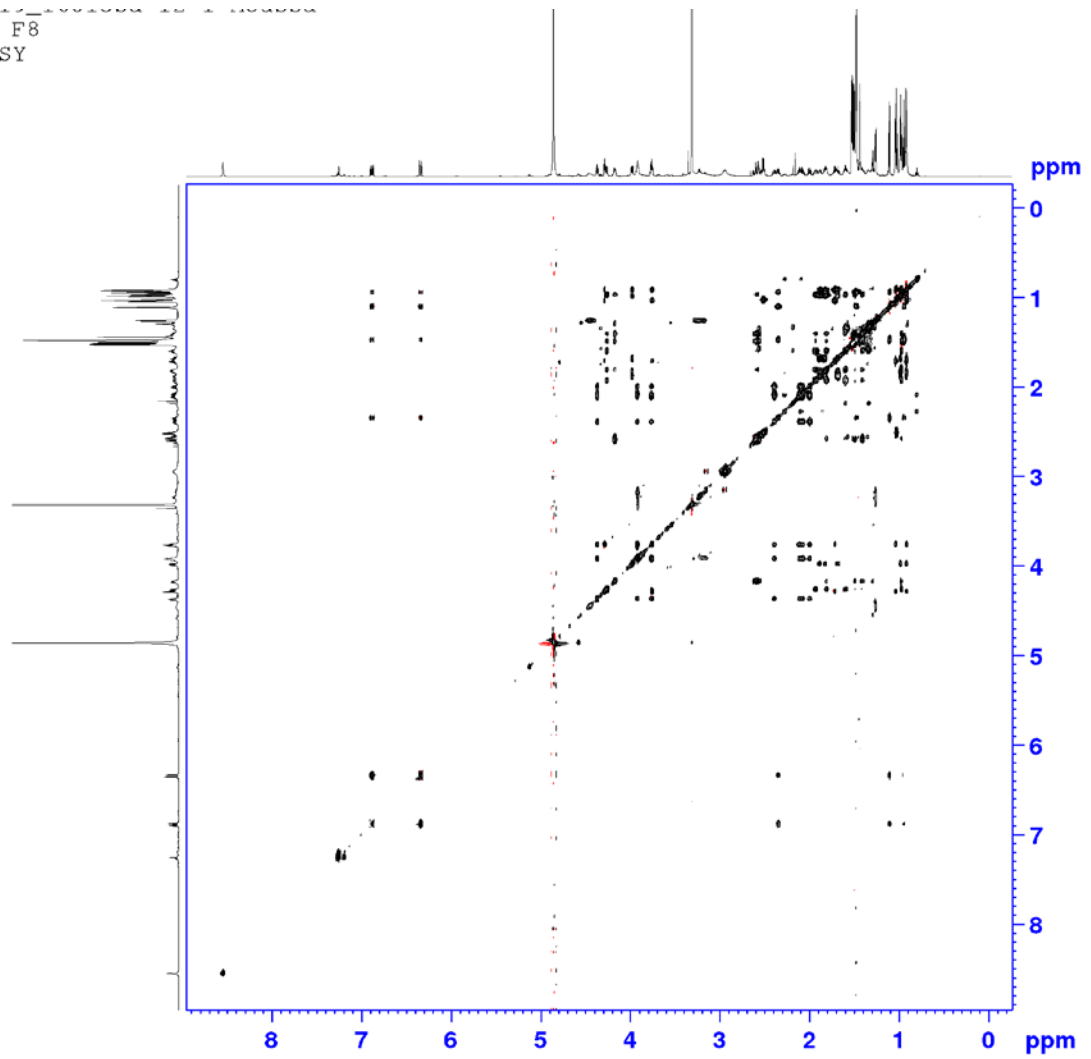

**S17 Figure: TOCSY spectra of leucinostatin Q 2**

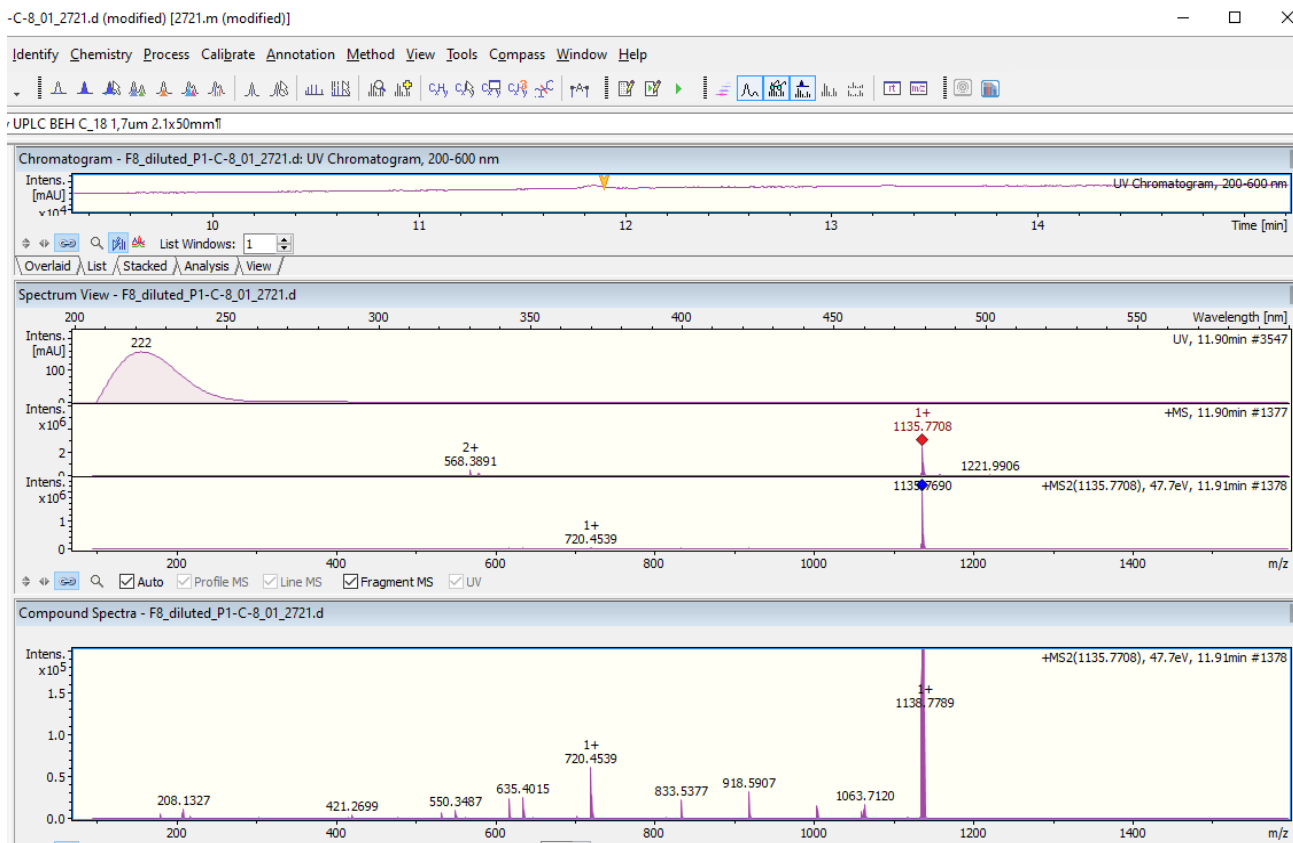

**S18 Figure: HR-ESI-MS-MS fragmentation pattern of leucinostatin Q 2.**

**S3 Table.** <sup>1</sup>H NMR and <sup>13</sup>C NMR data of **leucinostatin P 3** and its characteristic chemical shift values.

| residue      | position  | δC, type  | δH( J in Hz)      | residue     | position    | δC, type  | δH( J in Hz) |      |
|--------------|-----------|-----------|-------------------|-------------|-------------|-----------|--------------|------|
| <b>ΔMHA</b>  | <b>1</b>  | 165.28,C  |                   | <b>Aib2</b> | <b>1</b>    | 173.23,C  |              |      |
|              | <b>2</b>  | 120.19,CH | 6.22              |             | <b>2</b>    | 55.8,C    |              |      |
|              | <b>3</b>  | 150.59,CH | 6.64              |             | <b>3</b>    | 25.18,CH3 | 1.39         |      |
|              | <b>4</b>  | 37.17,CH  | 2.25              |             | <b>4</b>    | 23.06,CH3 | 1.33         |      |
|              | <b>5</b>  | 28.22,CH2 | 1.36              |             | <b>NH</b>   |           | 7.47         |      |
|              | <b>6</b>  | 11.29,CH3 | 0.87              |             | <b>Leu</b>  | <b>1</b>  | 173.78,C     |      |
|              | <b>7</b>  | 18.62,CH3 | 1.01              |             |             | <b>2</b>  | 53.88,CH     | 3.79 |
| <b>Pro</b>   | <b>1</b>  | 173.16,C  |                   | <b>3</b>    |             | 38.74,CH2 | 1.55         |      |
|              | <b>2</b>  | 61.28,CH  | 4.24              |             |             |           | 1.75         |      |
|              | <b>3</b>  | 29.19,CH2 | 1.81              | <b>4</b>    |             | 23.79,CH  | 1.77         |      |
|              |           |           | 2.19              | <b>5</b>    |             | 21.27,CH3 | 0.85         |      |
|              | <b>4</b>  | 24.10,CH2 | 1.95              | <b>6</b>    |             | 22.58,CH3 | 0.91         |      |
|              | <b>5</b>  | 46.90,CH2 | 3.82              | <b>NH</b>   |             | 7.02      |              |      |
|              |           |           | 3.56              | <b>Aib3</b> | <b>1</b>    | 175.23,C  |              |      |
| <b>AHMOD</b> | <b>1</b>  | 173.63,C  |                   |             | <b>2</b>    | 24.30,CH3 | 1.34         |      |
|              | <b>2</b>  | 52.65,CH  | 4.15              |             | <b>3</b>    | 25.01,CH3 | 1.33         |      |
|              | <b>3</b>  |           |                   |             | <b>4</b>    | 56.5,C    |              |      |
|              |           |           |                   |             | <b>NH</b>   |           | 7.6          |      |
|              | <b>4</b>  | 25.11,CH  | 1.7               |             | <b>Aib4</b> | <b>1</b>  | 171.4,C      |      |
|              | <b>5</b>  | 44.90,CH2 | 1.21              |             |             | <b>2</b>  | 55.7,C       |      |
|              |           |           | 1.28              | <b>3</b>    |             | 23.85,CH3 | 1.35         |      |
| <b>6</b>     | 64.02,CH  | 3.96      | <b>4</b>          | 24.10,CH3   |             | 1.32      |              |      |
| <b>7</b>     | 51.12,CH2 | 2.57      | <b>NH</b>         |             |             | 7.6       |              |      |
|              |           | 2.54      | <b>C-terminal</b> | <b>1</b>    |             | 43.62,CH  | 3.85         |      |

|              |           |           |      |           |           |      |
|--------------|-----------|-----------|------|-----------|-----------|------|
|              | <b>8</b>  | 209.95,C  |      | <b>2</b>  | 54.13,CH2 | 2.5  |
|              | <b>9</b>  | 35.66,CH2 | 2.43 |           |           | 2.48 |
|              | <b>10</b> | 7.20,CH3  | 0.9  | <b>3</b>  | 51.12,CH2 | 2.57 |
|              | <b>11</b> | 22.58,CH3 | 0.91 |           |           | 2.54 |
|              | <b>NH</b> |           | 6.93 | <b>4</b>  | 60.18,CH2 | 3.4  |
| <b>Hyleu</b> | <b>1</b>  | 172.16,C  |      | <b>NH</b> |           | 8.25 |
|              | <b>2</b>  | 63.85,CH  | 4.01 |           |           |      |
|              | <b>3</b>  | 73.88,CH  | 3.67 |           |           |      |
|              | <b>4</b>  | 29.57,CH  | 1.58 |           |           |      |
|              | <b>5</b>  | 13.50,CH3 | 0.85 |           |           |      |
|              | <b>6</b>  | 18.98,CH3 | 0.81 |           |           |      |
|              | <b>NH</b> |           | 7.8  |           |           |      |
| <b>Aib1</b>  | <b>1</b>  | 174.68,C  |      |           |           |      |
|              | <b>2</b>  | 56.03,C   |      |           |           |      |
|              | <b>3</b>  | 23.57,CH3 | 1.33 |           |           |      |
|              | <b>4</b>  | 26.01,CH3 | 1.36 |           |           |      |
|              | <b>NH</b> |           |      |           |           |      |
|              |           |           | 8.43 |           |           |      |

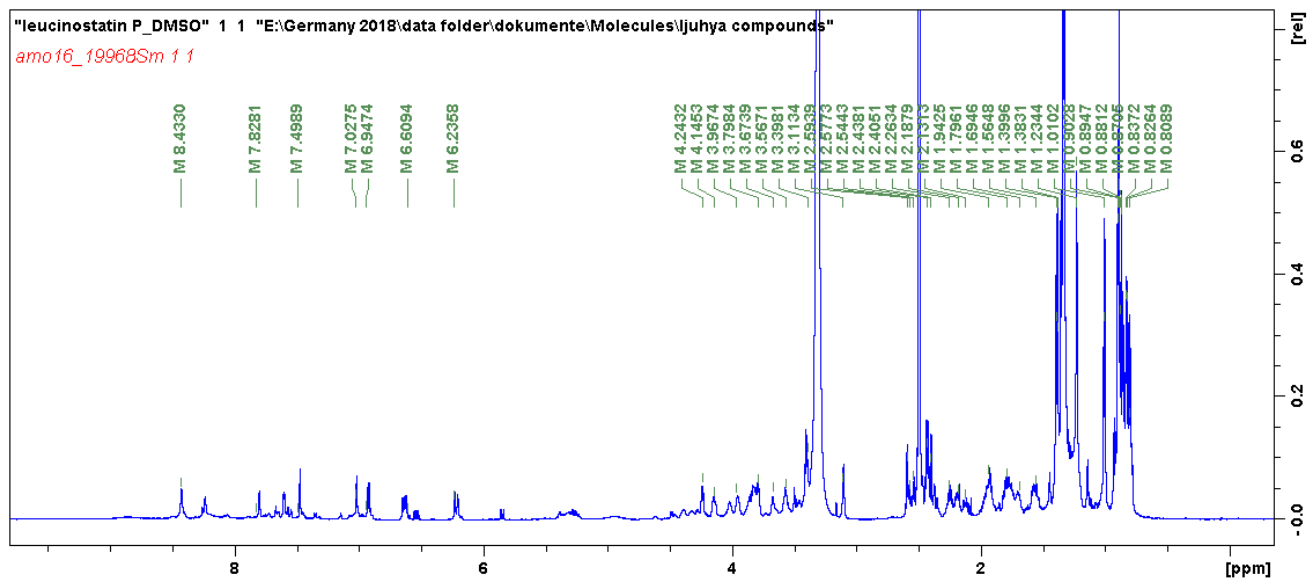

S19 figure: <sup>1</sup>H NMR spectra of leucinoctatin P 3

42D-F7  
HSQC

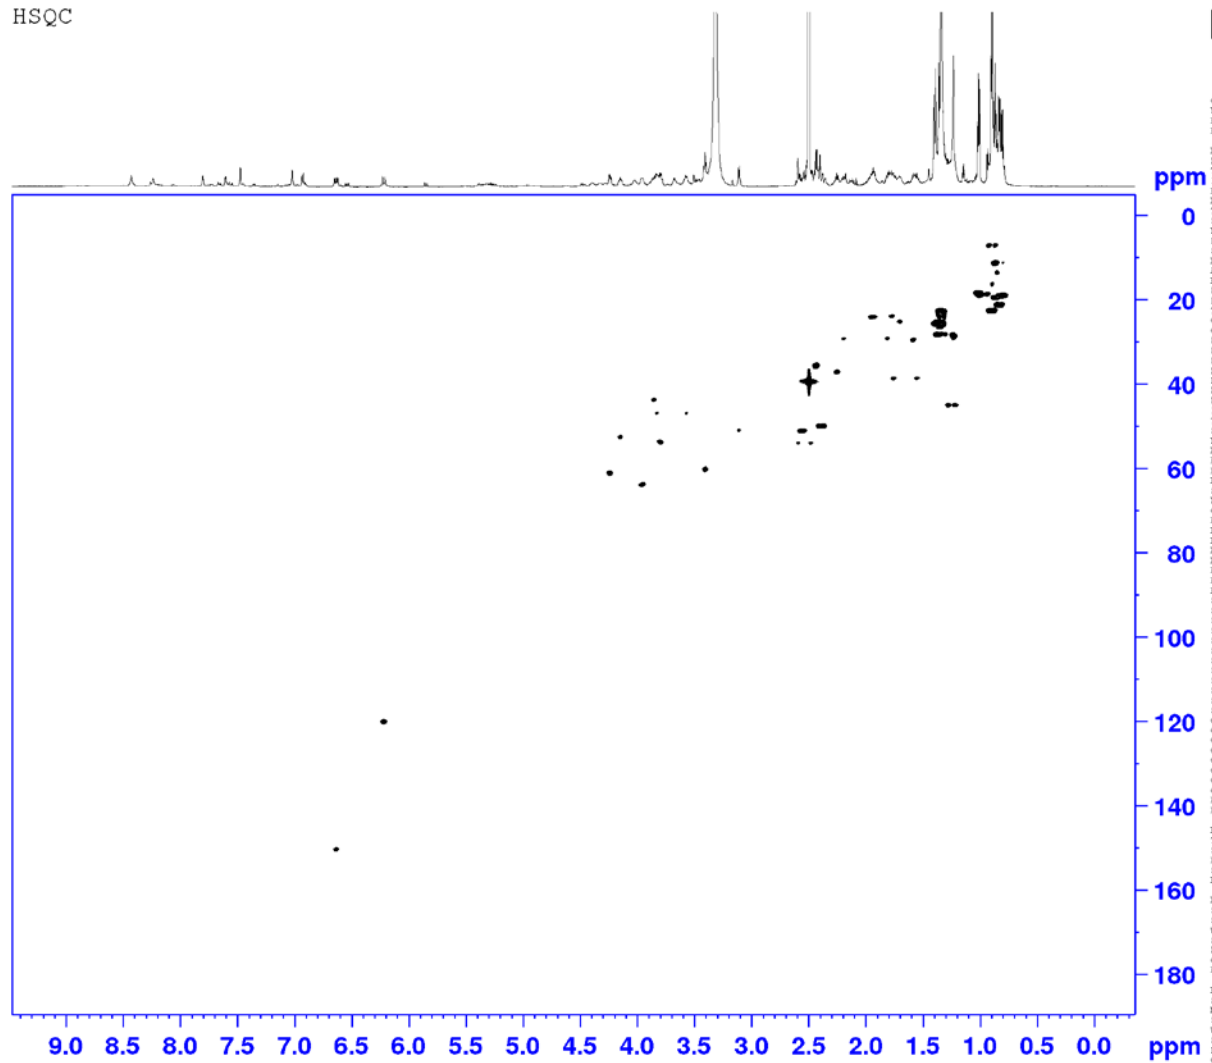

S20 Figure: HSQC spectra of leucinostatin P 3



42D-F7  
HMBC

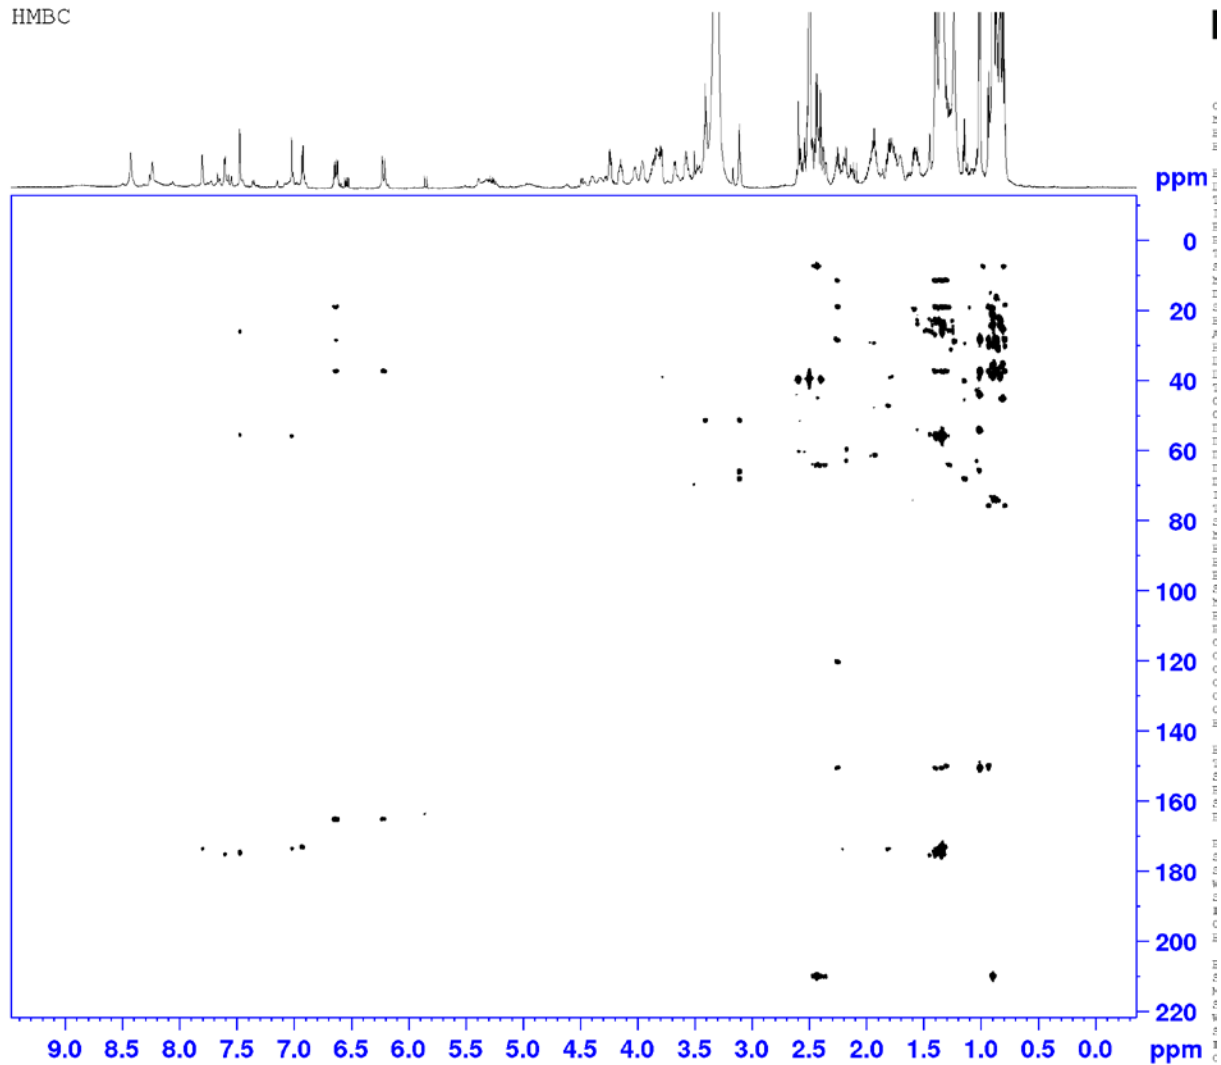

S21 Figure: HMBC spectra of leucinostatin P 3

am016\_199005m 3 1 MOUSSA  
42D-F7  
Cosy

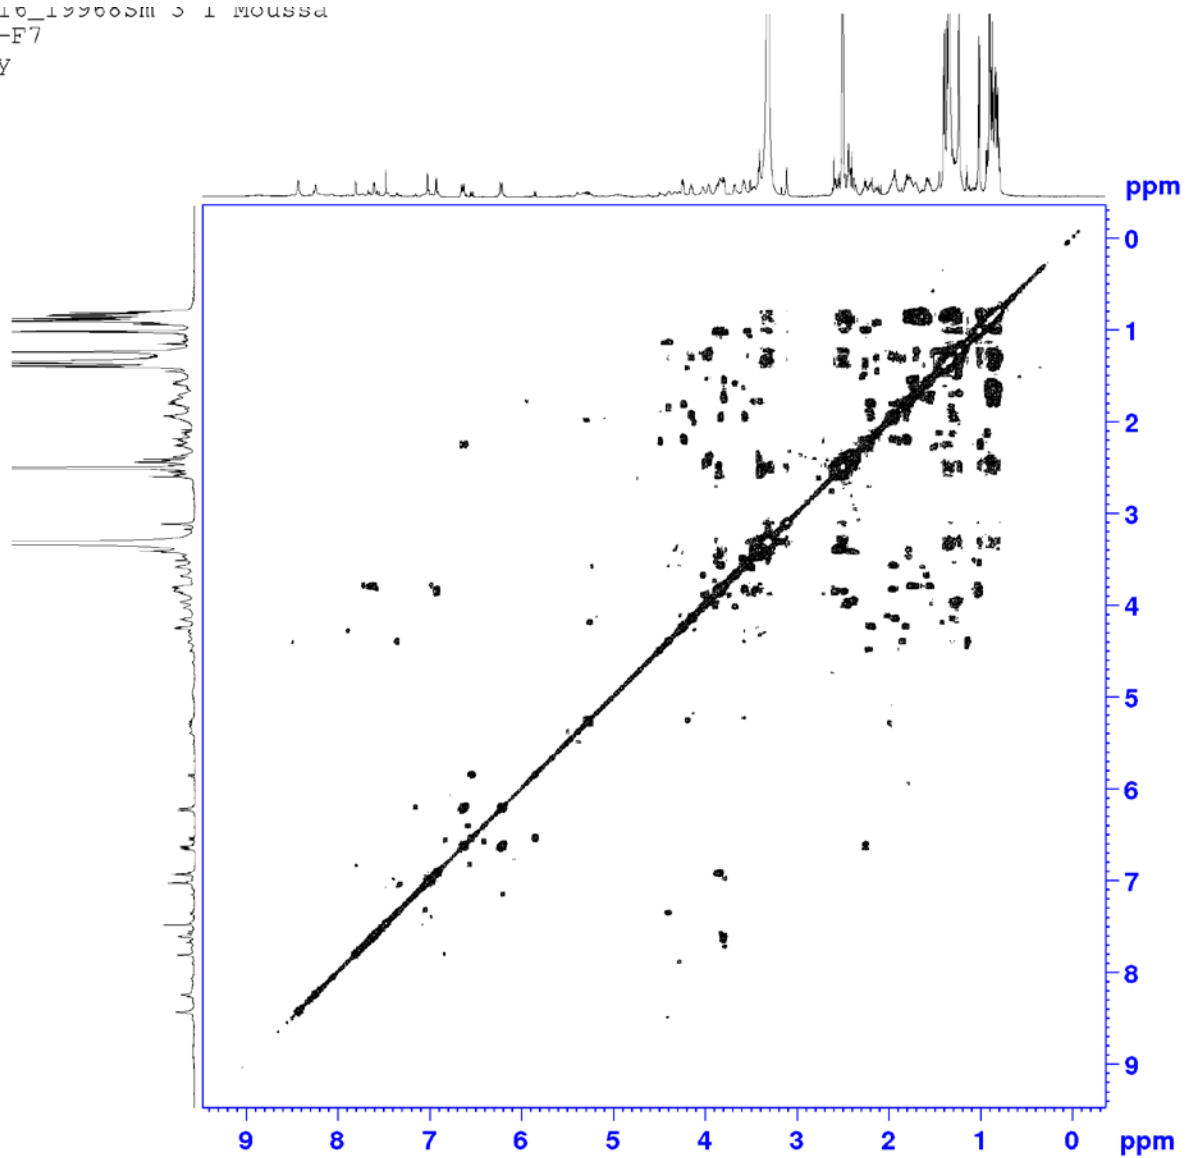

S22 Figure: COSY spectra of leucinostatin P 3.

glt010\_1550000000\_4\_1\_00055a  
42D-F7  
Noesy

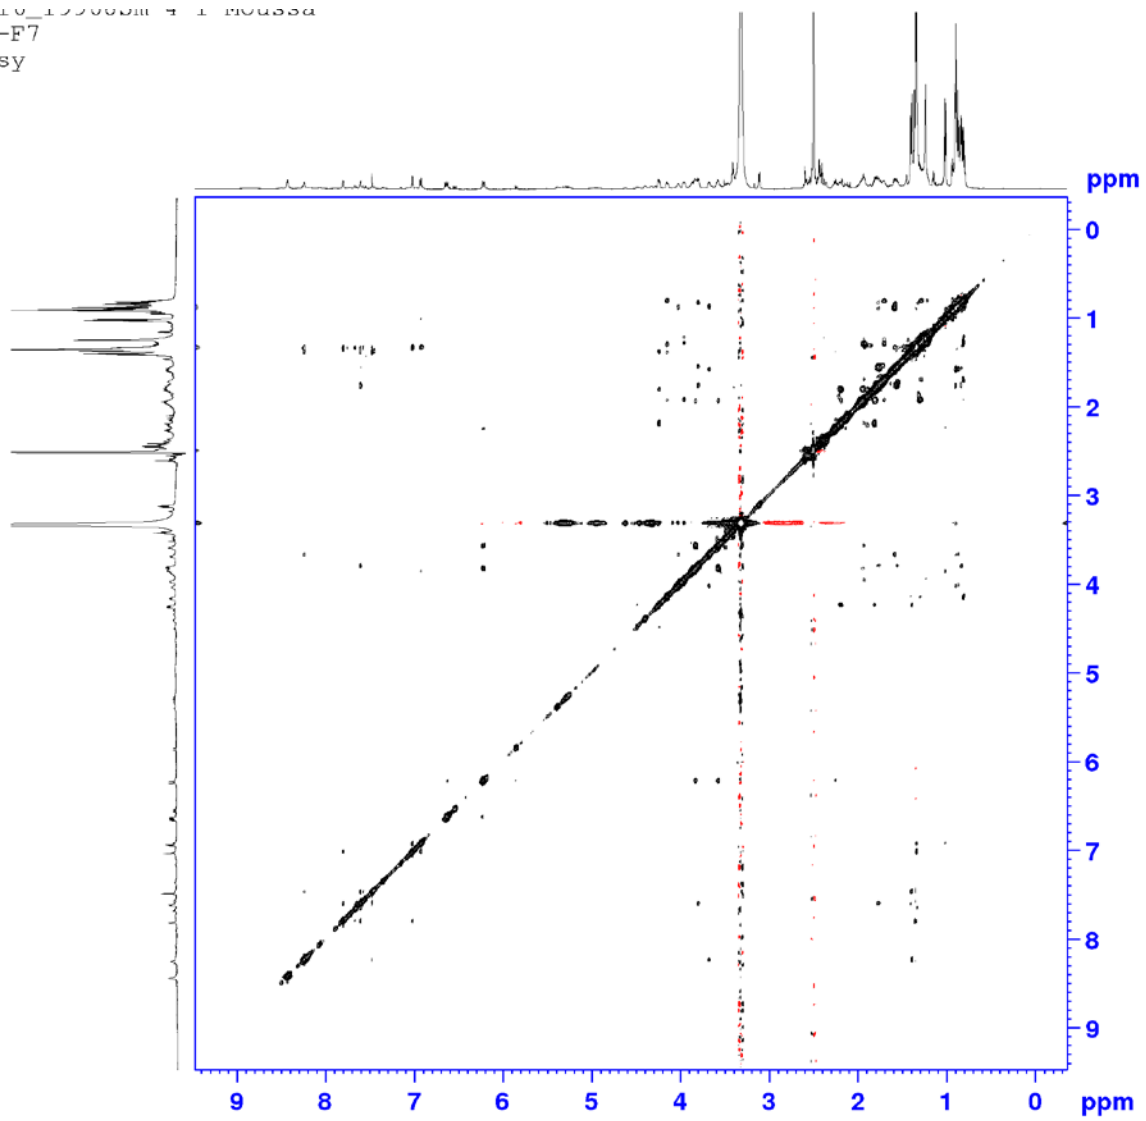

S23 Figure: NOESY spectra of leucinostatin P 3

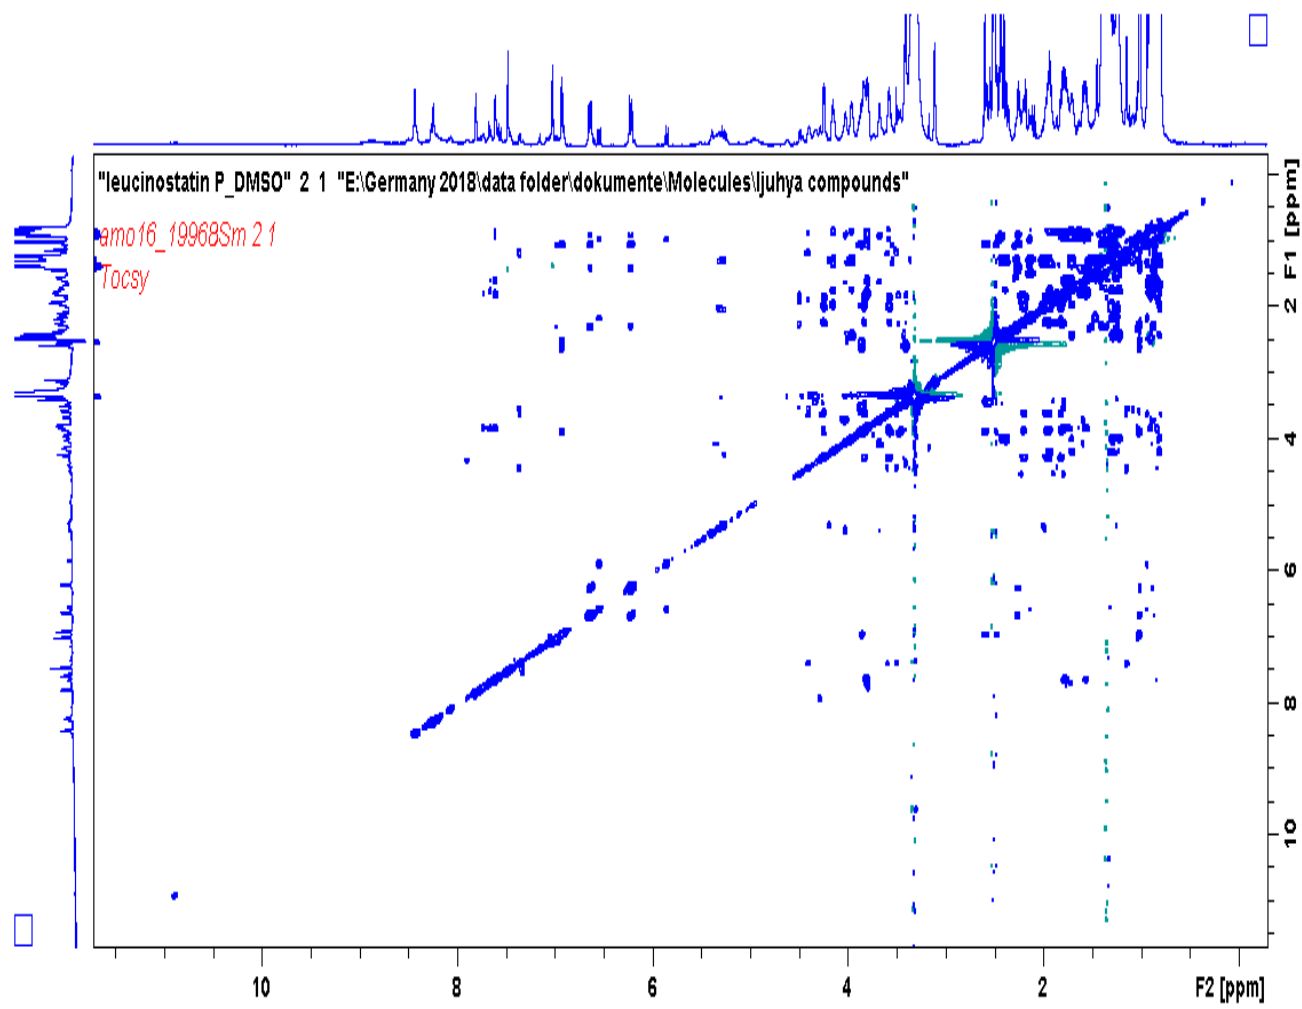

S24 Figure: TOCSY spectra of leucinostatin P 3.

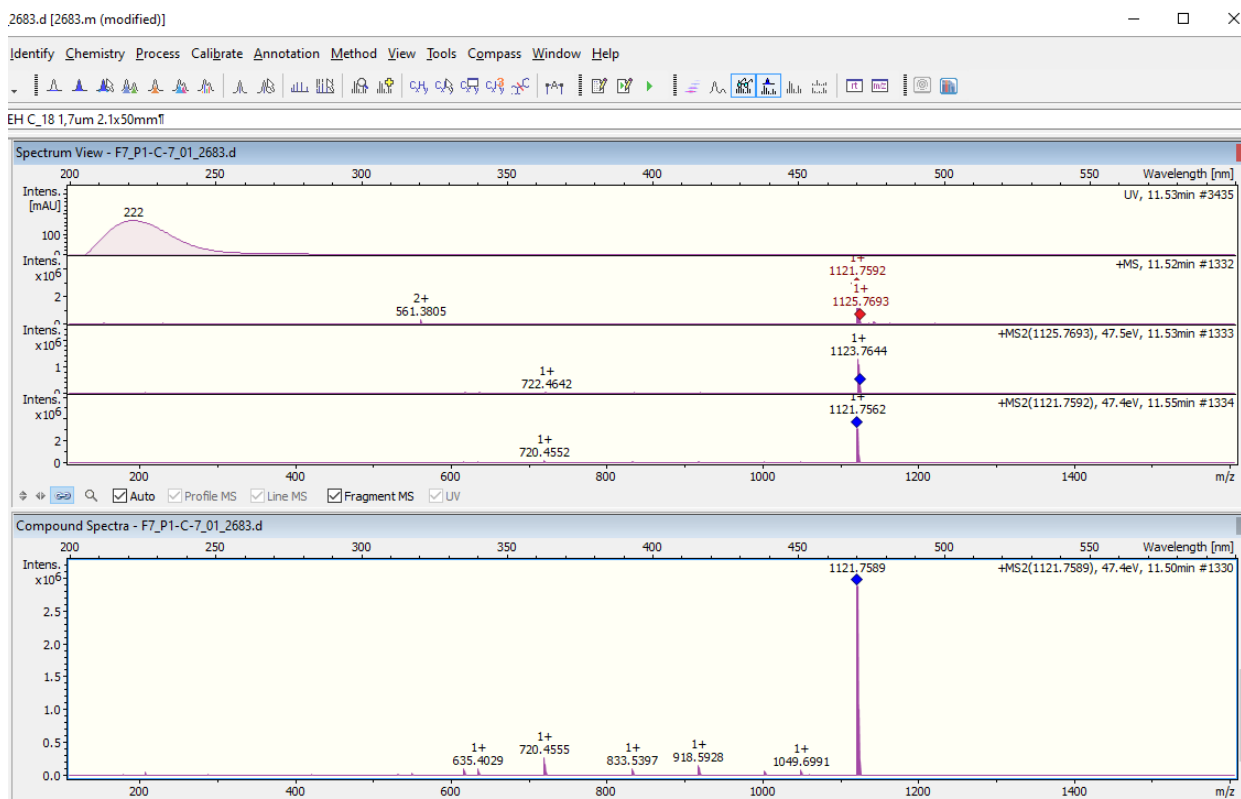

S25 Figure: HR-ESI-MSMS fragmentation pattern of leucinostatin P 3.

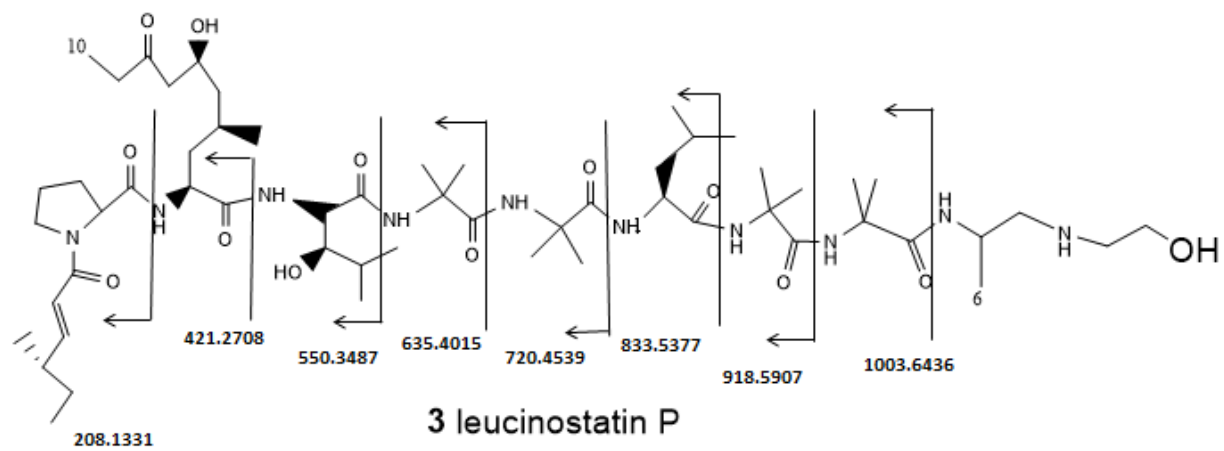

**S26 Figure:** HR-ESI-MS-MS fragments of leucinostatin P 3.

**S4 Table.** <sup>1</sup>H NMR and <sup>13</sup>C NMR data of **arthrichitin D 4** and its characteristic chemical shift values

| Arthrichitin D |          |                       |                      |           |                           |                   |
|----------------|----------|-----------------------|----------------------|-----------|---------------------------|-------------------|
| residue        | position | $\delta C$ , type     | $\delta H$ (J in Hz) |           | $\delta H$ (J in Hz)      | $\delta C$ , type |
| L-Glu          | 1        | 169.92,C              |                      |           | Dimethyl-oxy-hexadecanoyl |                   |
|                | 2        | 52.50,CH              | 4.19                 | 27        | 173.19,C                  |                   |
|                | 3        | 25.20,CH <sub>2</sub> | 1.82                 | 28        | 40.70,CH                  | 3.11              |
|                |          |                       | 2.04                 | 29        | 82.30,CH                  | 4.91              |
|                | 4        | 30.50,CH <sub>2</sub> | 2.25                 | 30        | 130.20,C                  |                   |
|                |          |                       | 2.4                  | 31        | 129.9,CH                  | 6.12              |
| 5              | 173.02,C |                       | 32                   | 125.70,CH | 6.33                      |                   |
| NH             |          |                       | 33                   | 136.50,CH | 5.84                      |                   |
| L-Gly          | 6        | 169.30,C              | 4.05                 | 34        | 32.10,CH <sub>2</sub>     | 2.19              |
|                | 7        | 43.40,CH <sub>2</sub> | 3.73                 | 35        | 31.50,CH <sub>2</sub>     | 1.34              |
|                |          |                       | 3.9                  | 36        | 28.9,CH <sub>2</sub>      | 1.35              |
|                | NH       |                       | 8.06                 | 37        | 24.40,CH <sub>2</sub>     | 1.33              |
| L-Phe          | 8        | 171.50,C              |                      | 38-40     | 22.10,CH <sub>2</sub>     | 1.36              |
|                | 9        | 55.01,CH              | 4.13                 | 42        | 14.74,CH <sub>3</sub>     | 0.9               |
|                | 10       | 36.60,CH <sub>2</sub> | 3.43                 | 43        | 14.04,CH <sub>3</sub>     | 0.96              |
|                |          |                       |                      | 44        | 11.25,CH <sub>3</sub>     | 1.64              |
|                | 11       | 138.55,C              |                      |           |                           |                   |
|                | 12       | 129.40,CH             | 7.34                 |           |                           |                   |
|                | 13       | 128.34,CH             | 7.34                 |           |                           |                   |
|                | 14       | 126.25,CH             | 7.26                 |           |                           |                   |
|                | 15       | 128.22,CH             | 7.38                 |           |                           |                   |
|                | 16       | 129.30,CH             | 7.27                 |           |                           |                   |
|                | NH       |                       | 8.81                 |           |                           |                   |
| L-Gln          | 17       | 171.60,C              |                      |           |                           |                   |
|                | 18       | 56.60,CH              | 3.83                 |           |                           |                   |
|                | 19       | 26.00,CH <sub>2</sub> | 1.71                 |           |                           |                   |
|                | 20       | 32.37,CH <sub>2</sub> | 2.18                 |           |                           |                   |
|                | 21       | 170.13,C              |                      |           |                           |                   |
| NH             |          | 7.97                  |                      |           |                           |                   |
| L-Val          | 22       | 170.0,C               |                      |           |                           |                   |
|                | 23       | 55.6,CH               | 4.56                 |           |                           |                   |
|                | 24       | 33.27,CH              | 2.04                 |           |                           |                   |
|                | 25       | 19.17,CH <sub>3</sub> | 0.89                 |           |                           |                   |
|                | 26       | 17.79,CH <sub>3</sub> | 0.88                 |           |                           |                   |
|                | NH       |                       | 7.98                 |           |                           |                   |

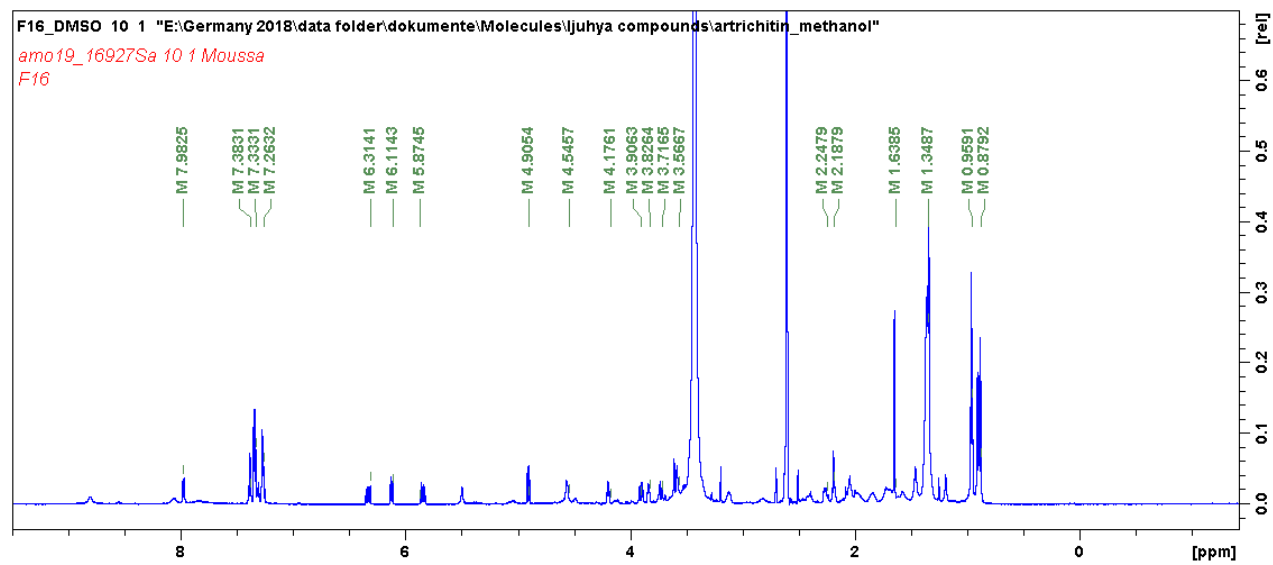

S27.Figure:  $^1\text{H}$  NMR spectra of arthrichitin D 4



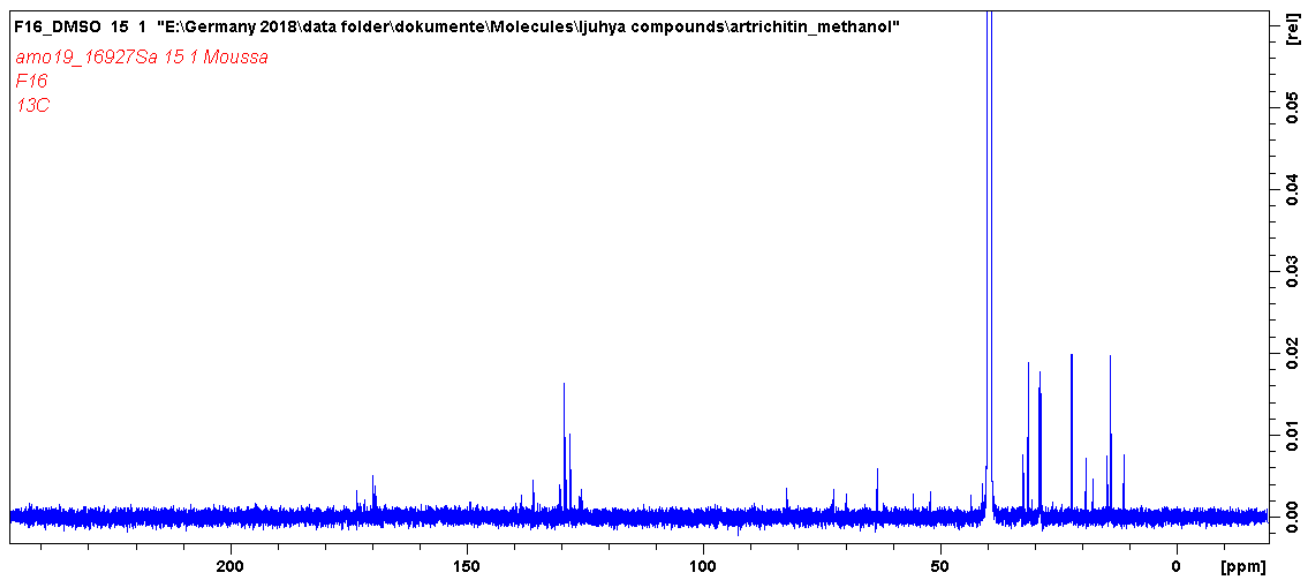

S28 Figure:  $^{13}\text{C}$ NMR spectra of arthrichitin D 4

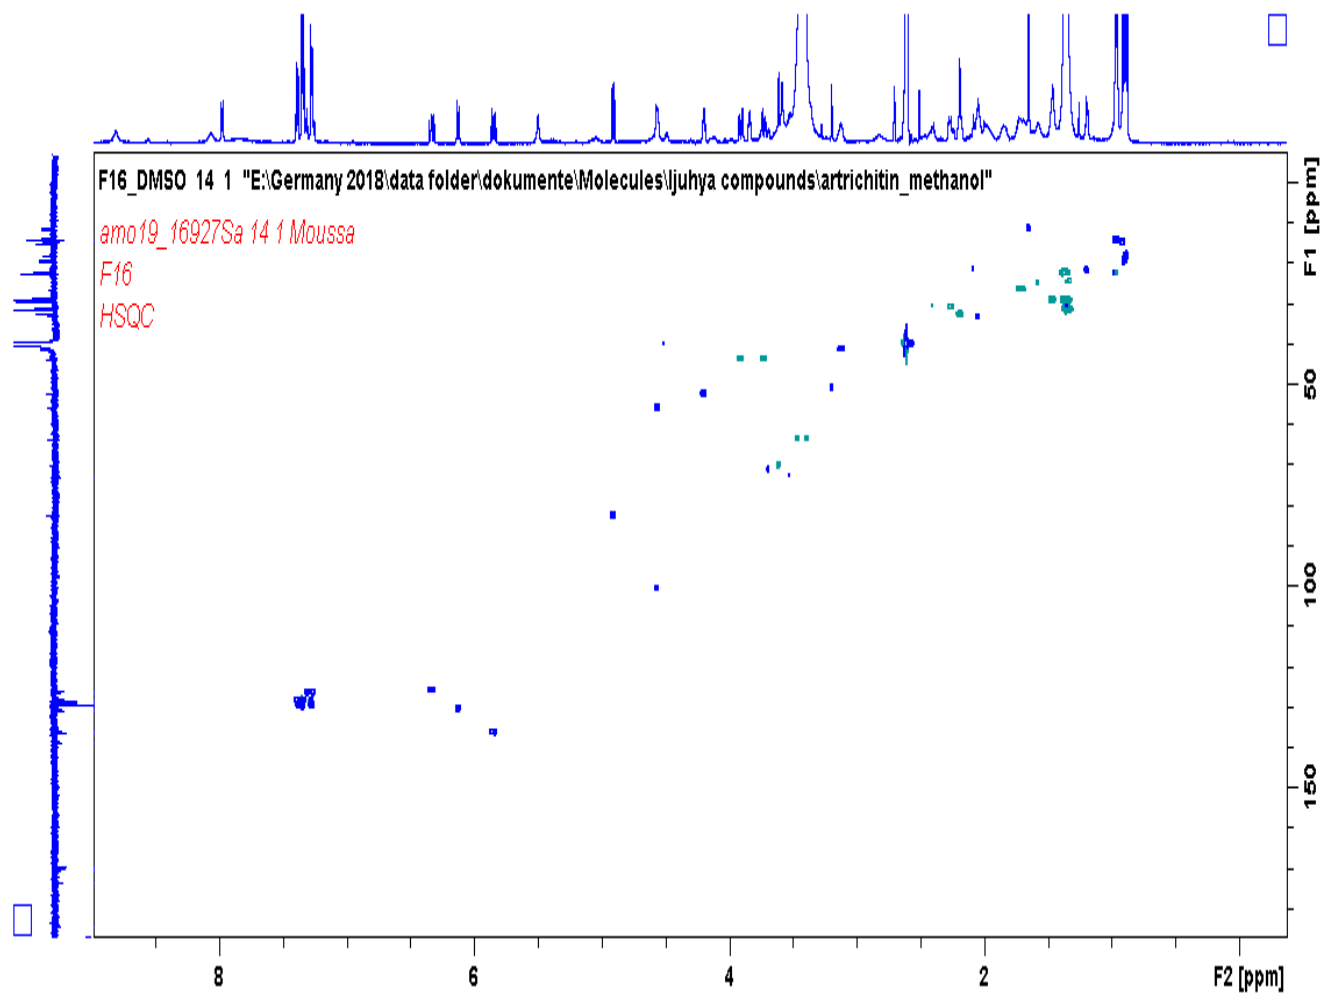

S29 Figure: HSQC spectra of arthrichitin D 4

F16  
HMBC

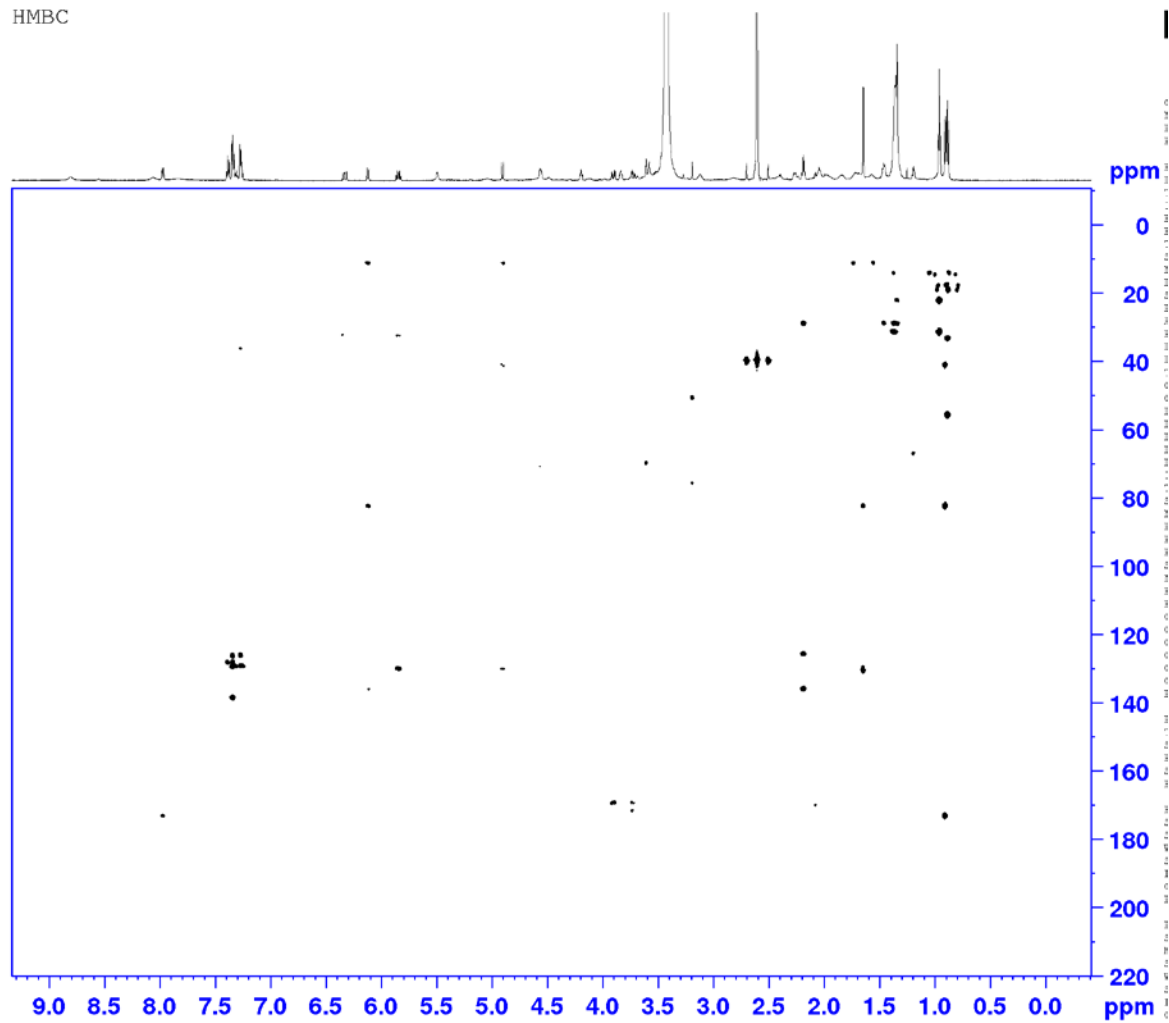

S30 Figure: HMBC spectra of arthrichitin D 4..

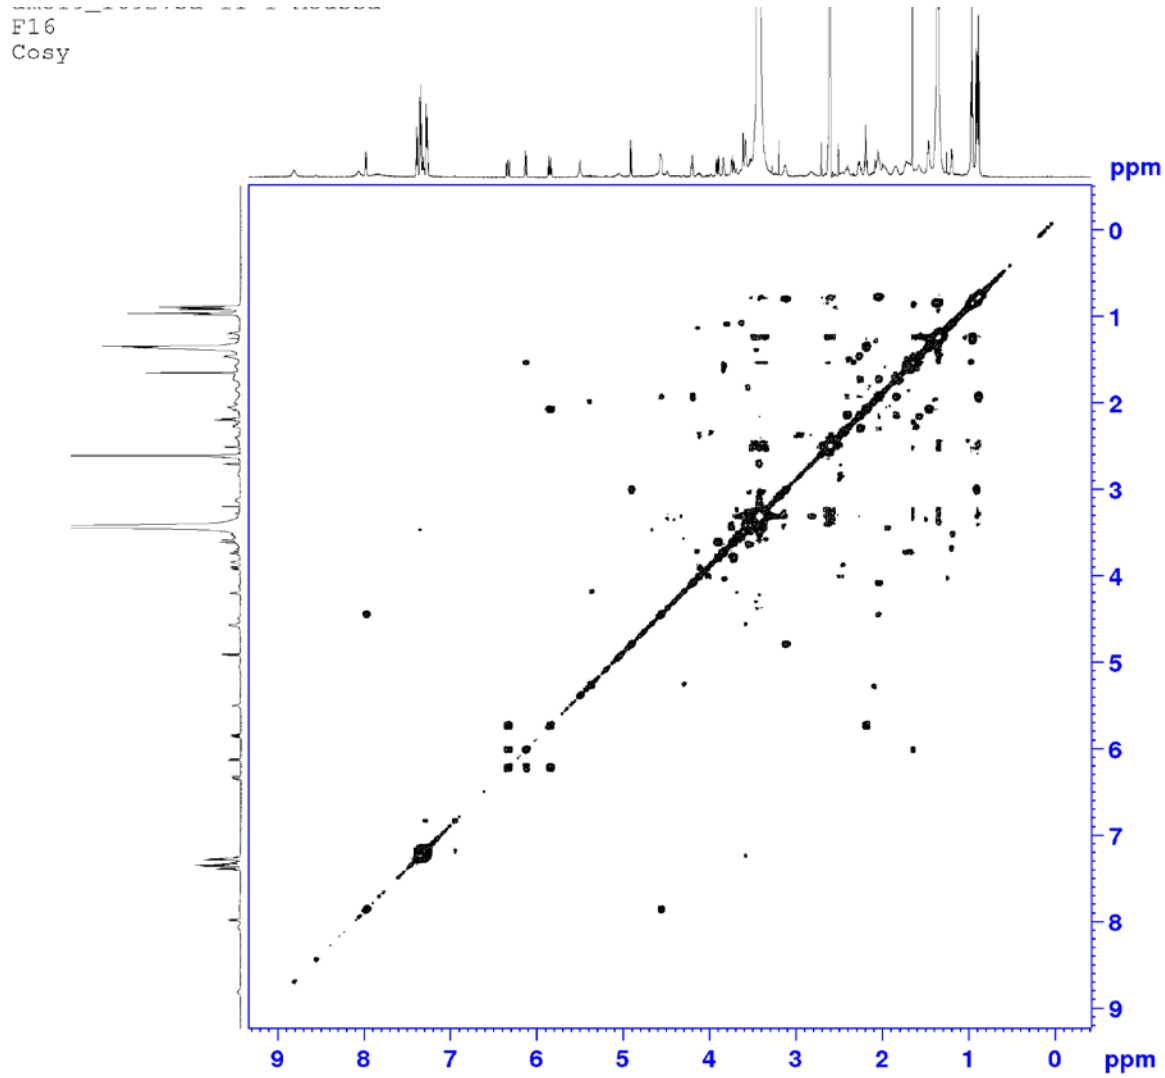

S31 Figure: COSY spectra of arthrichitin D 4

F16  
Noesy

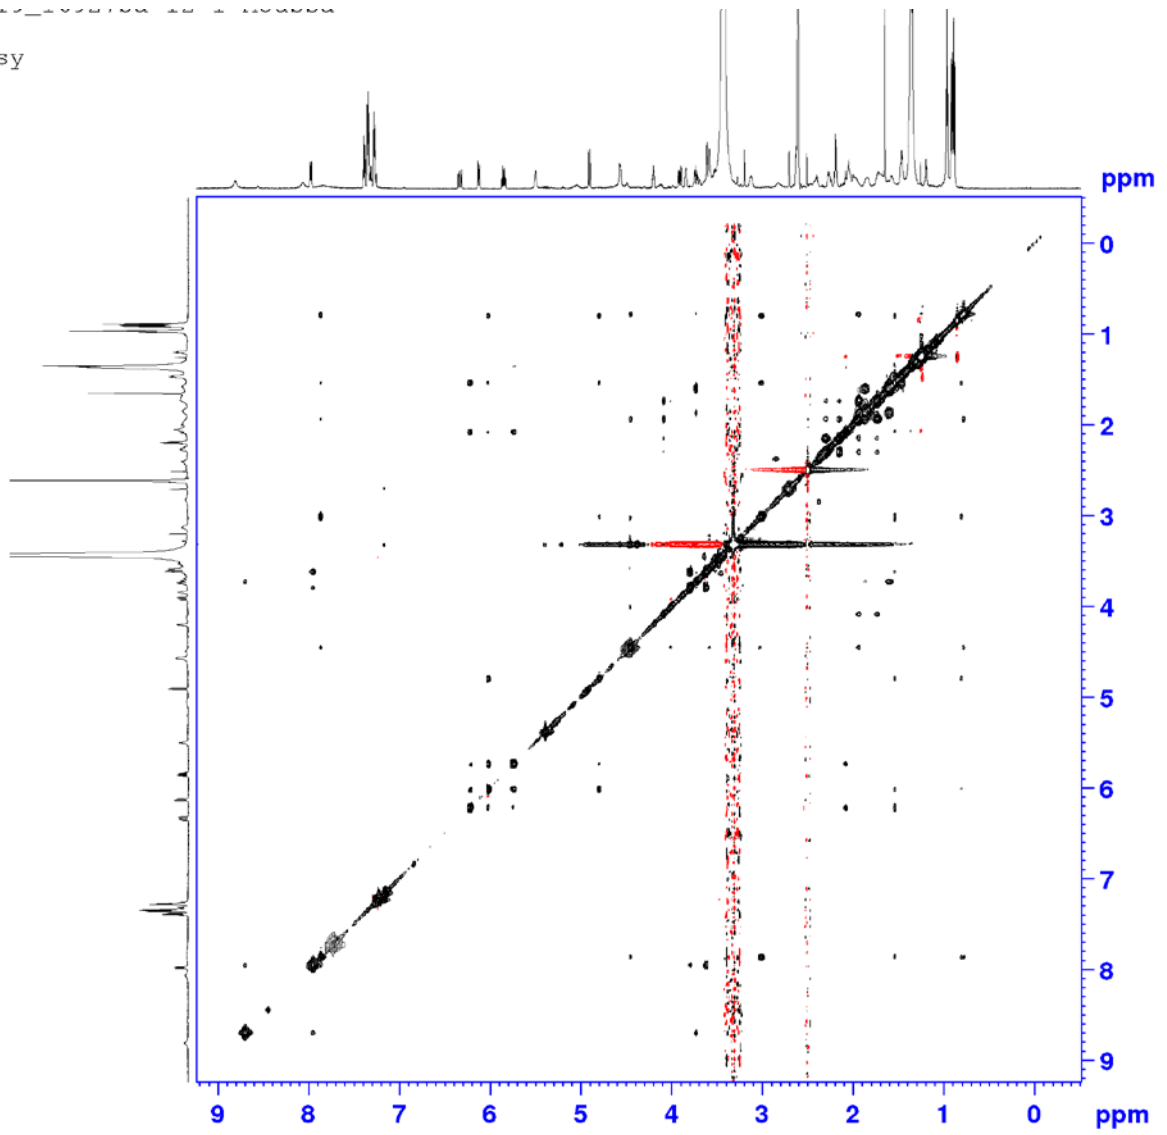

S32 Figure: NOESY spectra of arthrichitin D 4

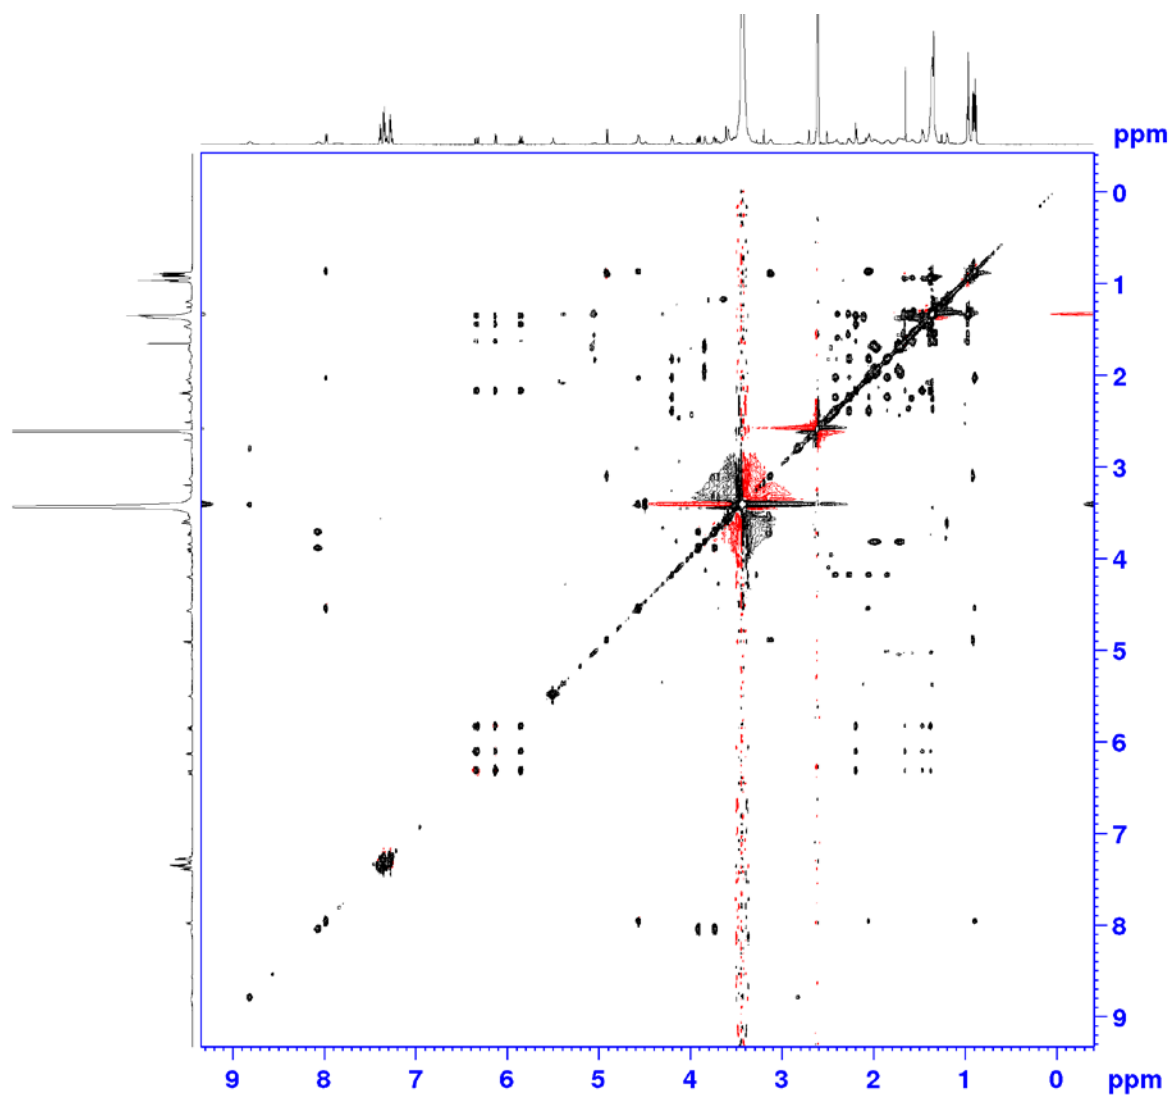

S33 Figure: ROESY spectra of arthrichitin D 4

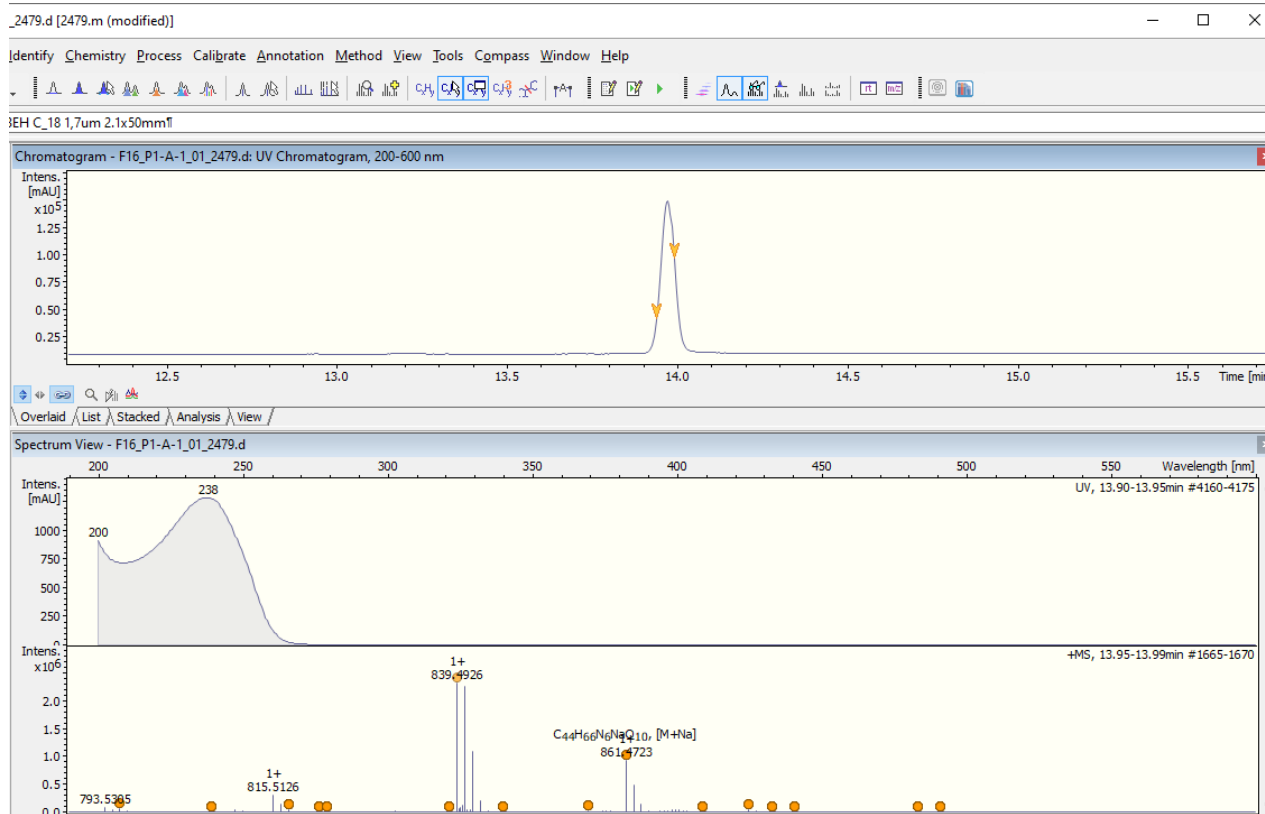

**S34.Figure: HR-ESI-MS of arthrichitin D 4.**

**S12 Text:** <sup>1</sup>H NMR and <sup>13</sup>C NMR data of **chaetoglobosin B 5** and its characteristic chemical shift values.

### Chaetoglobosin B 5

Yellow powder, UV absorption  $\lambda_{\max}$  200, 222, 281 nm, HR-ESI-MS m/z 1057.5321 [2M+H]<sup>+</sup> (calcd for C<sub>32</sub>H<sub>36</sub>N<sub>2</sub>O<sub>5</sub>); <sup>1</sup>H NMR (700 MHz, methanol-d<sub>4</sub>)  $\delta$ H 3.53 (H-3, dd, J=8.4, 5.2 Hz), 3.84 (H-7, d, J= 9.4 Hz), 2.07 (H-8, dd, J= 9.4, 12.3 Hz), 2.87 (H-10a, dd, J=5.3, 14.5 Hz), 2.57 (H-10b, dd, J=5.3, 14.5 Hz), 1.28 (H-11, s), 1.65 (H-12, s), 6.05 (H-13, dd, J=9.4, 15.9 Hz), 5.15 (H-14, ddd, J=3.5, 10.2, 15.5 Hz), 2.32(H-15a, m), 2.01 (H-15b,m), 2.58 (H-16, m), 5.57(H-17, d, J=9.6 Hz), 5.11 (H-19,s), 6.68 (H-21, d, J=16.2 Hz), 7.46 (H-22,d J=5.6 Hz), 7.02 (H-2', brs), 7.48 (H-4', m), 7.01 (H-5', t, J=7.1 Hz), 7.07(H-6', t, J= 7.3 Hz), 7.32 (H-7', d, J= 8.3Hz), 1.01(Me-16, d, J=6.8 Hz), 1.42 (Me-18, s).

**S13 Text:** <sup>1</sup>H NMR and <sup>13</sup>C NMR data of **19-O-acetyl chaetoglobosin B (6)** and its characteristic chemical shift values.

### 19-O-acetyl chaetoglobosin B 6

Yellow powder, UV absorption  $\lambda_{\max}$  199, 223, 280 nm, HR-ESI-MS m/z 571.2801 [M+H]<sup>+</sup>, HR-ESI-MS m/z (calcd for C<sub>34</sub>H<sub>38</sub>N<sub>2</sub>O<sub>6</sub>); <sup>1</sup>H NMR (700 MHz, methanol-d<sub>4</sub>)  $\delta$ H 3.60 (H-3, dd, J=3.2,8.5 Hz), 3.26 (H-4, m), 3.89 (H-7, d, J= 9.4 Hz), 2.10 (H-8, m), 2.89 (H-10a,dd, J=14.3, 4.3 Hz), 2.60 (H-10b,dd, J=14.3, 4.3 Hz), 1.32 (H-11, s), 1.65 (H-12, s), 6.17 (H-13, dd, J=15.3, 9.5 Hz), 5.19 (H-14, ddd, J= 3.5, 9.5, 15.4 Hz), 2.01 (H-15a, m), 2.32 (H-15b, m), 2.61 (H-16, m), 5.77 (H-17, d, J=9.4 Hz), 5.92 (H-19, s), 6.80 (H-21, m), 7.66 (H-22, m), 7.15 (H-2', brs), 7.53 (H-4', d, J=7.9 Hz), 7.01 (H-5', 7.09 (H-6', t), 7.38 (H-7', d, J= 8.15 Hz), 2.11 ( 19-O-acetyl);<sup>13</sup>C NMR (175 MHz, methanol-d<sub>4</sub>)  $\delta$ H<sup>13</sup>C 59.0 (C-3), 48.4 (C-4), 127.1 (C-5), 134.0 (C-6), 69.2 (C-7), 52.3 ( C-8), 62.2 (C-9), 33.2 (C-10), 17.7 (C-11), 14.6 (C-12), 129.1 (C-13), 135.5 (C-14), 41.9 (C-15), 33.0 (C-16), 143.3 (C-17), 127.9 (C-18), 84.2 (C-19), 194.9 (C-20), 135.0 (C-21), 136.8 (C-22), 199.7 (C-23), 172.5 ( C-24), 124.5 (C-2'), 111.7 (C-3'), 119.2(C-4'), 119.6 (C-5'), 122.3 (C-6'), 112.3 (C-7'), 169.4 ( 19-O-acetyl C=O), 20.2 ( 19-O-acetyl -Me), 137.1 (C-1a'), 128.0 (C-3a').
